# Supplementary material for: Understanding the insertion reactions of CO2, aldehyde and alkene into Cu–X (X = B, C, O) bonds
Source: Royal Society of Chemistry journal article supplement (doi:10.1039/d0nj06094a), 2021-01-01
Supplement: d0nj06094a1.pdf [file d0nj06094a1.pdf]

## **Electronic Supplementary Information**

### **Understanding the Insertion Reactions of CO<sub>2</sub>, Aldehyde and Alkene into Cu-X (X = B, C, O) Bonds**

Xueying Guo and Zhenyang Lin\*

Department of Chemistry, The Hong Kong University of Science and Technology, Clear Water Bay,  
Kowloon, Hong Kong, P.R. China.

\*Corresponding author e-mail: [chzlin@ust.hk](mailto:chzlin@ust.hk) (Z. Y. Lin)

#### **Contents:**

|                                                                                                                                                                                                                                    |    |
|------------------------------------------------------------------------------------------------------------------------------------------------------------------------------------------------------------------------------------|----|
| 1 <b>Figure S1.</b> Energy profiles calculated for the insertion of (a) CO <sub>2</sub> , (b) PhCHO, and (c) styrene into the Cu-OH bond in (NHC)CuOH ( <b>3'</b> ) .....                                                          | S2 |
| 2 <b>Figure S2.</b> Energy profiles calculated for other possible pathways and processes that are relevant to the reaction mechanism for the reactions shown in equation (2) .....                                                 | S3 |
| 3 <b>Table S1.</b> NPA charges of LCu, Beg and the CO <sub>2</sub> , PhCHO and styrene fragments in reactants, rate-determining transition states and products in the reactions of <b>1</b> with small molecules.....              | S4 |
| 4 <b>Table S2.</b> NPA charges of LCu, CH <sub>3</sub> and the CO <sub>2</sub> , PhCHO and styrene fragments in reactants, rate-determining transition states and products in the reactions of <b>2</b> with small molecules.....  | S4 |
| 5 <b>Table S3.</b> NPA charges of LCu, OR (R = CHPhBeg) and the CO <sub>2</sub> , PhCHO and styrene fragments in reactants, rate-determining transition states and products in the reactions of <b>3</b> with small molecules..... | S4 |
| 6 Cartesian coordinates for all optimized structures.....                                                                                                                                                                          | S5 |

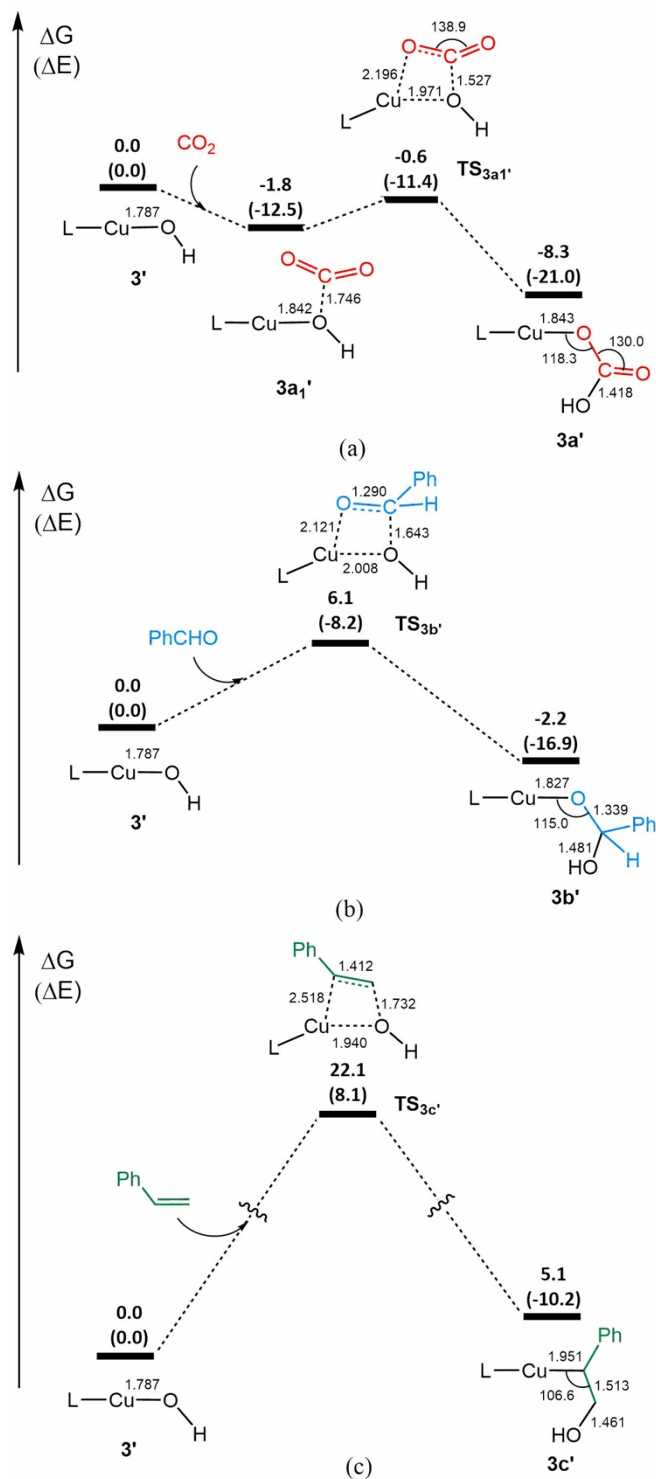

**Figure S1.** Energy profiles calculated for the insertion of (a) CO<sub>2</sub>, (b) PhCHO, and (c) styrene into the Cu-OH bond in (NHC)CuOH (**3'**). Relative free energies and electronic energies (in parenthesis) are given in kcal/mol.

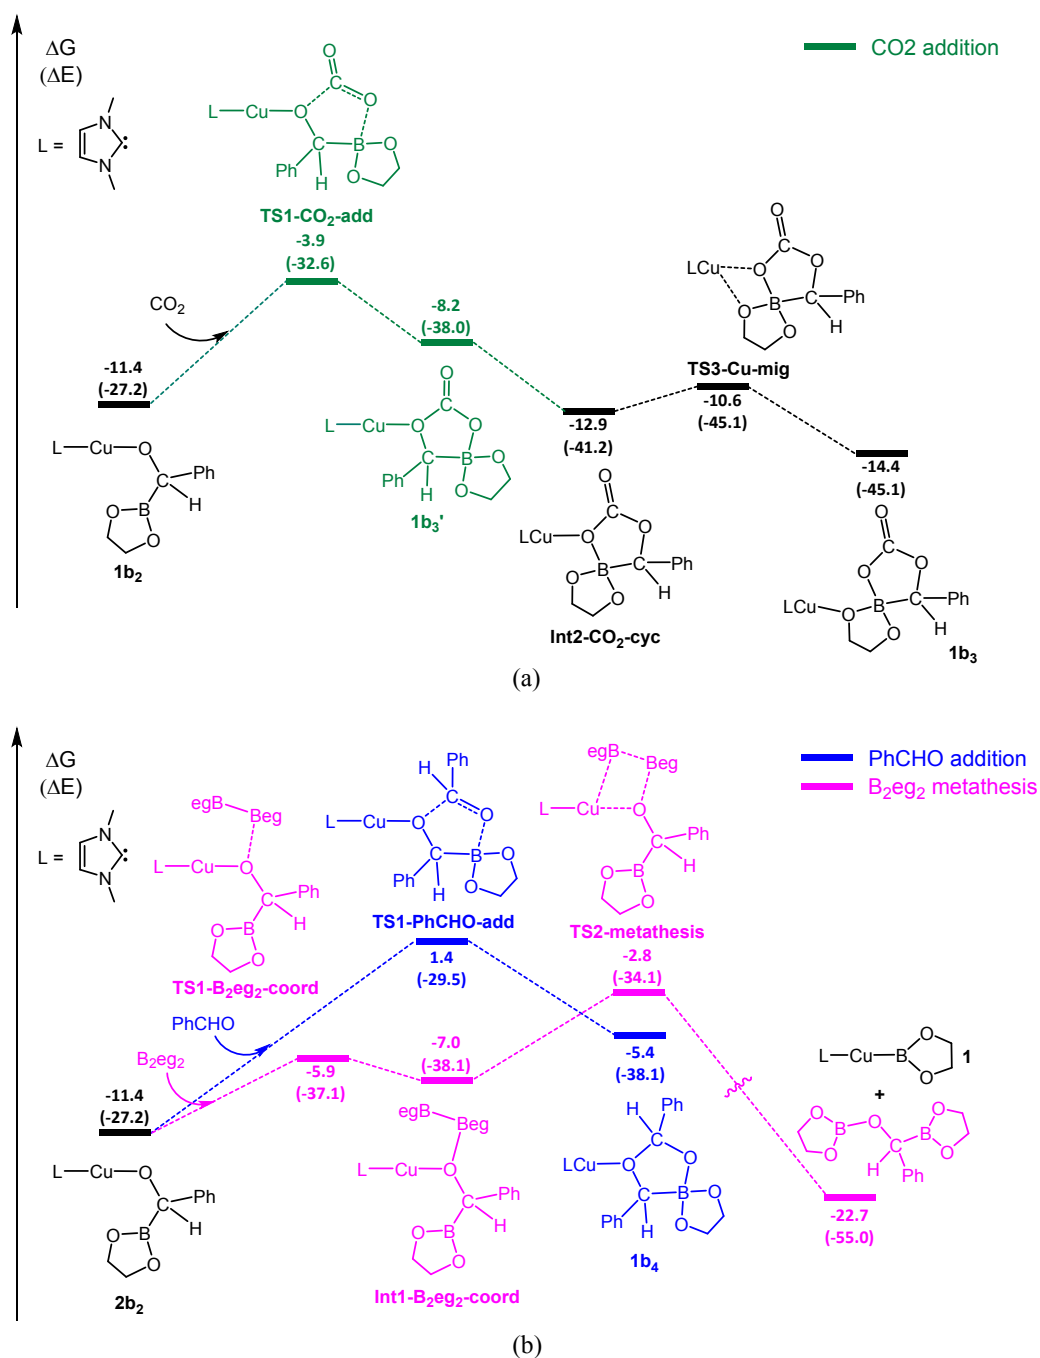

**Figure S2.** Energy profiles calculated for other possible pathways and processes that are relevant to the reaction mechanism for the reactions shown equation (2). (a) [2+3] cycloaddition of one  $\text{CO}_2$  C=O double bond with the O-C-B unit of  $\mathbf{1b}_2$  and (b) [2+3] cycloaddition of one PhCHO C=O double bond with the O-C-B unit of  $\mathbf{1b}_2$  and the possible metathesis reaction of  $\mathbf{1b}_2$  with  $\text{B}_2\text{eg}_2$ . Relative free energies and electronic energies (in parenthesis) are given in kcal/mol.

**Table S1.** NPA charges of LCu, Beg and the CO<sub>2</sub>, PhCHO and styrene fragments in reactants, rate-determining transition states and products in the reactions of **1** with small molecules.

|                         | LCu   | Beg    | CO <sub>2</sub> |
|-------------------------|-------|--------|-----------------|
| <b>1</b>                | 0.513 | -0.513 | 0.000           |
| <b>TS<sub>1a2</sub></b> | 0.946 | -0.260 | -0.685          |
| <b>1a<sub>2</sub></b>   | 0.823 | 0.103  | -0.926          |
|                         | LCu   | Beg    | PhCHO           |
| <b>1</b>                | 0.513 | -0.513 | 0.000           |
| <b>TS<sub>1b2</sub></b> | 1.046 | -0.180 | -0.866          |
| <b>1b<sub>2</sub></b>   | 0.805 | 0.255  | -1.061          |
|                         | LCu   | Beg    | styrene         |
| <b>1</b>                | 0.513 | -0.513 | 0.000           |
| <b>TS<sub>1c2</sub></b> | 1.067 | -0.176 | -0.892          |
| <b>1c<sub>2</sub></b>   | 0.747 | 0.279  | -1.026          |

**Table S2.** NPA charges of LCu, CH<sub>3</sub> and the CO<sub>2</sub>, PhCHO and styrene fragments in reactants, rate-determining transition states and products in the reactions of **2** with small molecules.

|                         | LCu   | CH <sub>3</sub> | CO <sub>2</sub> |
|-------------------------|-------|-----------------|-----------------|
| <b>2</b>                | 0.655 | -0.655          | 0.000           |
| <b>TS<sub>2a</sub></b>  | 0.918 | -0.378          | -0.540          |
| <b>2a</b>               | 0.821 | -0.117          | -0.704          |
|                         | LCu   | CH <sub>3</sub> | PhCHO           |
| <b>2</b>                | 0.655 | -0.655          | 0.000           |
| <b>TS<sub>2b2</sub></b> | 0.947 | -0.354          | -0.593          |
| <b>2b<sub>2</sub></b>   | 0.797 | -0.041          | -0.756          |
|                         | LCu   | CH <sub>3</sub> | styrene         |
| <b>2</b>                | 0.655 | -0.655          | 0.000           |
| <b>TS<sub>2c2</sub></b> | 0.954 | -0.254          | -0.700          |
| <b>2c<sub>2</sub></b>   | 0.742 | -0.023          | -0.720          |

**Table S3.** NPA charges of LCu, OR (R = CHPhBeg) and the CO<sub>2</sub>, PhCHO and styrene fragments in reactants, rate-determining transition states and products in the reactions of **3** with small molecules.

|                          | LCu   | OR     | CO <sub>2</sub> |
|--------------------------|-------|--------|-----------------|
| <b>3(1b<sub>2</sub>)</b> | 0.805 | -0.805 | 0.000           |
| <b>TS<sub>3a</sub></b>   | 0.882 | -0.464 | -0.418          |
| <b>3a</b>                | 0.840 | -0.376 | -0.464          |
|                          | LCu   | OR     | PhCHO           |
| <b>3(1b<sub>2</sub>)</b> | 0.805 | -0.805 | 0.000           |
| <b>TS<sub>3b</sub></b>   | 0.876 | -0.522 | -0.354          |
| <b>3b</b>                | 0.825 | -0.418 | -0.407          |
|                          | LCu   | OR     | styrene         |
| <b>3(1b<sub>2</sub>)</b> | 0.805 | -0.805 | 0.000           |
| <b>TS<sub>3c</sub></b>   | 0.879 | -0.573 | -0.306          |
| <b>3c</b>                | 0.761 | -0.363 | -0.398          |

## Cartesian coordinates for all optimized structures

|                         |           |           |           |                         |           |           |           |
|-------------------------|-----------|-----------|-----------|-------------------------|-----------|-----------|-----------|
| <b>I</b>                |           |           |           | <b>TS<sub>1a2</sub></b> |           |           |           |
| Cu                      | -0.223904 | -0.000001 | 0.000005  | Cu                      | -0.031710 | -0.498503 | -0.146806 |
| B                       | -2.206704 | 0.000000  | 0.000005  | B                       | 1.874592  | 0.097491  | 0.116694  |
| O                       | -3.006104 | 1.139401  | 0.075905  | O                       | 2.498392  | 0.159689  | 1.342394  |
| O                       | -3.006105 | -1.139399 | -0.075895 | O                       | 2.302795  | 1.081589  | -0.756506 |
| C                       | 1.693696  | -0.000002 | 0.000005  | C                       | -1.802308 | 0.166803  | -0.022606 |
| N                       | 2.536095  | -1.071902 | 0.014905  | N                       | -2.261104 | 1.426305  | -0.254806 |
| N                       | 2.536096  | 1.071898  | -0.014895 | N                       | -2.911910 | -0.534993 | 0.335194  |
| C                       | 3.866195  | -0.679203 | 0.009505  | C                       | -3.628103 | 1.509410  | -0.044306 |
| C                       | 3.866196  | 0.679197  | -0.009495 | C                       | -4.039408 | 0.269311  | 0.330094  |
| C                       | -4.392904 | 0.770702  | 0.049505  | C                       | 3.472996  | 1.216685  | 1.292794  |
| C                       | -4.392905 | -0.770698 | -0.049595 | C                       | 3.486797  | 1.670085  | -0.184306 |
| C                       | 2.067097  | 2.451598  | -0.034795 | C                       | -2.894015 | -1.954993 | 0.678594  |
| C                       | 2.067094  | -2.451602 | 0.034805  | C                       | -1.415400 | 2.538502  | -0.677106 |
| H                       | 2.415194  | -2.963702 | 0.937405  | C                       | 1.578585  | -1.755108 | -0.485506 |
| H                       | 4.682195  | -1.385703 | 0.019505  | O                       | 2.733185  | -1.822512 | -0.855606 |
| H                       | 4.682197  | 1.385697  | -0.019495 | O                       | 0.620183  | -2.538205 | -0.371706 |
| H                       | -4.881305 | -1.135698 | -0.961595 | H                       | -4.180700 | 2.426512  | -0.179606 |
| H                       | -4.877805 | -1.249498 | 0.810205  | H                       | -5.019309 | -0.103086 | 0.586694  |
| H                       | -4.877804 | 1.249502  | -0.810195 | H                       | 4.439794  | 0.827582  | 1.625894  |
| H                       | -4.881304 | 1.135702  | 0.961605  | H                       | 3.162098  | 2.016986  | 1.975794  |
| H                       | 2.415197  | 2.963698  | -0.937395 | H                       | 4.361496  | 1.289882  | -0.724106 |
| H                       | 0.976097  | 2.423799  | -0.030295 | H                       | 3.442301  | 2.757485  | -0.302406 |
| H                       | 2.421797  | 2.991498  | 0.848905  | H                       | -3.592217 | -2.504390 | 0.040594  |
| H                       | 0.976094  | -2.423701 | 0.030305  | H                       | -1.882617 | -2.329996 | 0.513794  |
| H                       | 2.421694  | -2.991502 | -0.848895 | H                       | -3.171016 | -2.095992 | 1.727694  |
| <b>CO<sub>2</sub></b>   |           |           |           | <b>H</b>                |           |           |           |
| C                       | 0.000000  | 0.000000  | 0.000000  | H                       | -0.387901 | 2.177298  | -0.742906 |
| O                       | 0.000000  | 0.000000  | 1.160443  | H                       | -1.734799 | 2.906503  | -1.656806 |
| O                       | 0.000000  | 0.000000  | -1.160443 | H                       | -1.470697 | 3.352502  | 0.052094  |
| <b>TS<sub>1a1</sub></b> |           |           |           | <b>1a<sub>2</sub></b>   |           |           |           |
| Cu                      | -0.057103 | 0.256896  | -0.048906 | Cu                      | -0.388015 | -0.958125 | -0.181529 |
| B                       | -1.910903 | -0.338105 | 0.211094  | B                       | 2.611499  | -0.034111 | 0.070606  |
| O                       | -2.679503 | -0.097505 | 1.333594  | O                       | 3.378852  | 0.255950  | 1.166816  |
| O                       | -2.549902 | -1.190505 | -0.673706 | O                       | 2.123561  | 1.101602  | -0.555097 |
| C                       | 1.841397  | -0.212002 | 0.024294  | C                       | -1.961659 | 0.003676  | -0.039124 |
| N                       | 2.359198  | -1.433902 | -0.285706 | N                       | -2.203212 | 1.269963  | -0.479708 |
| N                       | 2.924297  | 0.509198  | 0.424394  | N                       | -3.148805 | -0.392660 | 0.500727  |
| C                       | 3.729698  | -1.472801 | -0.086606 | C                       | -3.509903 | 1.653287  | -0.221418 |
| C                       | 4.087297  | -0.242501 | 0.364494  | C                       | -4.107576 | 0.603303  | 0.399115  |
| C                       | -3.917602 | -0.820306 | 1.220994  | C                       | 3.393293  | 1.678329  | 1.352765  |
| C                       | -3.877502 | -1.458606 | -0.185506 | C                       | 2.718086  | 2.246923  | 0.083812  |
| C                       | 2.866096  | 1.894298  | 0.881694  | C                       | -3.362452 | -1.702268 | 1.104238  |
| C                       | 1.559299  | -2.552103 | -0.774806 | C                       | -1.209312 | 2.094244  | -1.160803 |
| H                       | 4.320599  | -2.354601 | -0.282006 | C                       | 2.341868  | -1.511691 | -0.448626 |
| H                       | 5.050697  | 0.156500  | 0.643294  | O                       | 3.291267  | -2.151503 | -0.880725 |
| H                       | -4.751503 | -0.121907 | 1.346294  | O                       | 1.117098  | -1.968868 | -0.373469 |
| H                       | -3.967802 | -1.568006 | 2.022094  | H                       | -3.895322 | 2.622530  | -0.496346 |
| H                       | -4.603002 | -1.006507 | -0.871406 | H                       | -5.112778 | 0.482311  | 0.771196  |
| H                       | -4.042601 | -2.541606 | -0.168406 | H                       | 4.426404  | 2.017920  | 1.471394  |
| H                       | 3.567295  | 2.506799  | 0.307394  | H                       | 2.839233  | 1.924472  | 2.266514  |
| H                       | 1.855196  | 2.266198  | 0.722394  | H                       | 3.438923  | 2.700860  | -0.605529 |
| H                       | 3.120796  | 1.953399  | 1.944694  | H                       | 1.940203  | -2.984200 | 0.308053  |
| H                       | 0.510099  | -2.256003 | -0.728806 | H                       | -4.164810 | -2.236090 | 0.587789  |
| H                       | 1.825499  | -2.791302 | -1.809106 | H                       | -2.433597 | -2.264624 | 1.005356  |
| H                       | 1.718399  | -3.432802 | -0.145406 | H                       | -3.615036 | -1.602073 | 2.163552  |
| C                       | -1.188404 | 2.038196  | -0.723506 | H                       | -0.249579 | 1.576589  | -1.122942 |
| O                       | -2.315004 | 2.155895  | -1.058306 | H                       | -1.495680 | 2.254208  | -2.204299 |
| O                       | -0.078005 | 2.489396  | -0.591006 | H                       | -1.119197 | 3.062485  | -0.660506 |
| <b>1a<sub>1</sub></b>   |           |           |           | <b>PhCHO</b>            |           |           |           |
| Cu                      | 0.074088  | -0.557905 | -0.138444 | C                       | 0.043051  | -1.099601 | 0.000048  |
| B                       | 1.790039  | 0.327545  | 0.180632  | C                       | 0.532824  | 0.212712  | 0.000067  |
| O                       | 2.534584  | 0.253774  | 1.335503  | C                       | -0.359539 | 1.288918  | 0.000055  |
| O                       | 2.332018  | 1.217924  | -0.731544 | C                       | -1.732363 | 1.059436  | -0.000053 |
| C                       | -1.719366 | 0.235773  | -0.015961 | C                       | -2.213856 | -0.248491 | -0.000061 |
| N                       | -2.086161 | 1.511203  | -0.319415 | C                       | -1.325928 | -1.327731 | 0.000033  |
| N                       | -2.868854 | -0.339115 | 0.433206  | H                       | 0.754472  | -1.916984 | 0.000048  |
| C                       | -3.431513 | 1.726399  | -0.065280 | H                       | 0.026108  | 2.303928  | 0.000135  |
| C                       | -3.926557 | 0.555931  | 0.413805  | H                       | -2.424521 | 1.893525  | -0.000115 |
| C                       | 3.668532  | 1.132606  | 1.221677  | H                       | -3.282993 | -0.429409 | -0.000137 |
| C                       | 3.587316  | 1.702775  | -0.213010 | H                       | -1.707737 | -2.342289 | 0.000100  |
| C                       | -2.966608 | -1.720250 | 0.897053  | C                       | 1.992540  | 0.465463  | 0.000035  |
| C                       | -1.186008 | 2.520869  | -0.869827 | H                       | 2.272474  | 1.541738  | 0.000047  |
| C                       | 1.147475  | -2.196813 | -0.543847 | O                       | 2.842727  | -0.394344 | -0.000102 |
| O                       | 2.286373  | -2.522150 | -0.650637 | <b>TS<sub>1b1</sub></b> |           |           |           |
| O                       | -0.021146 | -2.585319 | -0.630566 | C                       | 2.195653  | 0.293623  | 0.123127  |
| H                       | -3.911614 | 2.675378  | -0.249126 | N                       | 2.709420  | 0.311065  | 1.387612  |
| H                       | -4.920842 | 0.286738  | 0.736121  | C                       | 4.082602  | 0.126723  | 1.386252  |
| H                       | 4.582763  | 0.557173  | 1.398113  | H                       | 4.667027  | 0.100752  | 2.293288  |
| H                       | 3.592890  | 1.911164  | 1.990010  | C                       | 4.449091  | -0.002599 | 0.085073  |
| H                       | 4.396143  | 1.339214  | -0.856192 | H                       | 5.418222  | -0.154445 | -0.365213 |
| H                       | 3.586873  | 2.797805  | -0.238586 | N                       | 3.288995  | 0.100892  | -0.666375 |
| H                       | -3.798601 | -2.222395 | 0.395134  | C                       | 1.898104  | 0.493406  | 2.585482  |
| H                       | -2.038193 | -2.234202 | 0.649043  | H                       | 2.356815  | 1.243293  | 3.236588  |
| H                       | -3.127219 | -1.748536 | 1.979559  | H                       | 0.912868  | 0.841270  | 2.269984  |
| H                       | -0.170658 | 2.122978  | -0.865810 | H                       | 1.794086  | -0.449185 | 3.132779  |
| H                       | -1.475358 | 2.767712  | -1.896180 | C                       | 3.257391  | 0.064383  | -2.125715 |
| H                       | -1.224054 | 3.426300  | -0.256606 | H                       | 3.876094  | -0.763672 | -2.483613 |

|                         |           |           |           |                         |           |           |           |
|-------------------------|-----------|-----------|-----------|-------------------------|-----------|-----------|-----------|
| H                       | 2.228096  | -0.095505 | -2.445596 | C                       | -2.808073 | -1.515678 | 0.970226  |
| H                       | 3.641335  | 1.004216  | -2.536705 | C                       | -4.742736 | 0.103409  | -0.209257 |
| O                       | -1.440793 | 2.722665  | 0.897275  | H                       | -3.274847 | 0.468967  | -1.739293 |
| O                       | -2.499343 | 1.699396  | -0.847178 | C                       | -4.057219 | -1.372511 | 1.566865  |
| C                       | -2.741960 | 3.331014  | 0.840705  | H                       | -2.051729 | -2.172238 | 1.382679  |
| C                       | -3.395900 | 2.741881  | -0.426329 | C                       | -5.029000 | -0.559559 | 0.983825  |
| B                       | -1.330390 | 1.743194  | -0.083988 | H                       | -5.499639 | 0.720697  | -0.682362 |
| C                       | -0.780294 | -0.859889 | -1.677685 | H                       | -4.280330 | -1.907005 | 2.484694  |
| O                       | 0.326915  | -1.076701 | -2.183848 | H                       | -6.004397 | -0.454685 | 1.446553  |
| H                       | -1.484761 | -0.143742 | -2.122983 | Cu                      | 0.745103  | -0.714180 | -0.161077 |
| C                       | -1.347311 | -1.742878 | -0.620979 | H                       | -0.702093 | 3.675794  | 0.710160  |
| C                       | -2.669186 | -1.577673 | -0.189851 | H                       | -2.293826 | 2.976407  | 0.320688  |
| C                       | -0.589725 | -2.811284 | -0.127806 | H                       | -1.694401 | 3.327082  | -1.984853 |
| C                       | -3.217990 | -2.458434 | 0.734916  | H                       | 0.028576  | 3.518810  | -1.581324 |
| H                       | -3.239156 | -0.735994 | -0.566274 |                         |           |           |           |
| C                       | -1.137706 | -3.686779 | 0.802927  | <b>1b<sub>2</sub>/3</b> |           |           |           |
| H                       | 0.421511  | -2.936448 | -0.495663 | C                       | 2.529085  | 0.095311  | 0.043900  |
| C                       | -2.452857 | -3.513141 | 1.235728  | N                       | 2.743310  | 0.460561  | 1.341013  |
| H                       | -4.241492 | -2.326126 | 1.068300  | C                       | 4.069882  | 0.287429  | 1.704673  |
| H                       | -0.547059 | -4.512847 | 1.184261  | H                       | 4.434232  | 0.518345  | 2.694023  |
| H                       | -2.882031 | -4.199807 | 1.957324  | C                       | 4.712846  | -0.197141 | 0.611097  |
| Cu                      | 0.315436  | 0.658062  | -0.293841 | H                       | 5.747247  | -0.465633 | 0.460181  |
| H                       | -2.630440 | 4.419885  | 0.796472  | N                       | 3.759535  | -0.309832 | -0.389092 |
| H                       | -3.294653 | 3.078369  | 1.754227  | C                       | 1.690127  | 0.934659  | 2.231460  |
| H                       | -4.386448 | 2.314296  | -0.236402 | H                       | 1.976434  | 1.893762  | 2.674402  |
| H                       | -3.488304 | 3.479201  | -1.233167 | H                       | 0.780716  | 1.062757  | 1.642276  |
|                         |           |           |           | H                       | 1.507896  | 0.207412  | 3.029245  |
| <b>1b<sub>1</sub></b>   |           |           |           | C                       | 4.015017  | -0.794524 | -1.738790 |
| C                       | 2.342403  | -0.343830 | 0.158674  | H                       | 4.490421  | -1.779547 | -1.705858 |
| N                       | 2.992181  | 0.248400  | 1.197911  | H                       | 3.051254  | -0.873081 | -2.244677 |
| C                       | 4.333168  | -0.101869 | 1.222077  | H                       | 4.657856  | -0.098328 | -2.287100 |
| H                       | 5.011316  | 0.259138  | 1.980057  | O                       | -1.148698 | 1.916413  | 0.309210  |
| C                       | 4.537119  | -0.928892 | 0.164693  | O                       | -3.247423 | 2.050245  | -0.596198 |
| H                       | 5.430692  | -1.420056 | -0.189035 | C                       | -1.698351 | 3.142585  | 0.815992  |
| N                       | 3.312112  | -1.067186 | -0.467764 | C                       | -3.161237 | 3.160636  | 0.307182  |
| C                       | 2.353368  | 1.091665  | 2.205530  | B                       | -2.074593 | 1.335950  | -0.537615 |
| H                       | 3.050655  | 1.878919  | 2.505628  | C                       | -1.817998 | -0.001293 | -1.338573 |
| H                       | 1.456306  | 1.546478  | 1.783098  | O                       | -0.550334 | -0.021649 | -1.926636 |
| H                       | 2.084835  | 0.497852  | 3.085598  | H                       | -2.579681 | -0.046548 | -2.138541 |
| C                       | 3.093005  | -1.864918 | -1.672030 | C                       | -2.126273 | -1.196818 | -0.422252 |
| H                       | 3.582089  | -2.836702 | -1.559512 | C                       | -3.384653 | -1.348851 | 0.176435  |
| H                       | 2.019138  | -2.014166 | -1.795172 | C                       | -1.148716 | -2.158260 | -0.166262 |
| H                       | 3.506104  | -1.354031 | -2.548371 | C                       | -3.653807 | -2.432011 | 1.007550  |
| O                       | -0.310640 | 2.477555  | 0.716276  | H                       | -4.158741 | -0.612099 | -0.019774 |
| O                       | -0.984383 | 2.261487  | -1.455993 | C                       | -1.416963 | -3.247812 | 0.661598  |
| C                       | -1.060630 | 3.674775  | 0.433463  | H                       | -0.194135 | -2.049086 | -0.667537 |
| C                       | -1.337712 | 3.605250  | -1.081722 | C                       | -2.667568 | -3.388120 | 1.257366  |
| B                       | -0.338786 | 1.641956  | -0.397237 | H                       | -4.635695 | -2.535257 | 1.458399  |
| C                       | -1.069265 | -1.170065 | -1.151516 | H                       | -0.646720 | -3.992389 | 0.838144  |
| O                       | -0.077240 | -1.982458 | -0.971688 | H                       | -2.877451 | -4.235216 | 1.901620  |
| H                       | -1.247169 | -0.762328 | -2.156320 | Cu                      | 0.940080  | 0.081030  | -0.897773 |
| C                       | -2.285494 | -1.247835 | -0.297397 | H                       | -1.109212 | 3.982134  | 0.429023  |
| C                       | -3.369338 | -0.390558 | -0.527377 | H                       | -1.630075 | 3.143219  | 1.908997  |
| C                       | -2.384559 | -2.213200 | 0.710382  | H                       | -3.887019 | 3.018334  | 1.116024  |
| C                       | -4.523276 | -0.490107 | 0.240755  | H                       | -3.413303 | 4.081668  | -0.228049 |
| H                       | -3.286659 | 0.366276  | -1.300800 |                         |           |           |           |
| C                       | -3.540755 | -2.311348 | 1.479189  | <b>Styrene</b>          |           |           |           |
| H                       | -1.548292 | -2.884841 | 0.863648  | C                       | -1.952494 | -0.527619 | -0.000363 |
| C                       | -4.613703 | -1.451543 | 1.249100  | C                       | -2.972223 | 0.334342  | 0.000456  |
| H                       | -5.355834 | 0.180224  | 0.055151  | C                       | -0.513831 | -0.220093 | -0.000220 |
| H                       | -3.609592 | -3.066630 | 2.255060  | C                       | 0.406032  | -1.279005 | 0.000002  |
| H                       | -5.514963 | -1.531143 | 1.847006  | C                       | 1.777815  | -1.043969 | 0.000224  |
| Cu                      | 0.471544  | -0.166973 | -0.407900 | C                       | 2.260945  | 0.261034  | 0.000179  |
| H                       | -0.468578 | 4.549385  | 0.722512  | C                       | 1.359787  | 1.326617  | -0.000079 |
| H                       | -1.981068 | 3.663932  | 1.029355  | C                       | -0.008409 | 1.090261  | -0.000289 |
| H                       | -2.388111 | 3.785013  | -1.332175 | H                       | -2.185251 | -1.590530 | -0.001169 |
| H                       | -0.719640 | 4.308800  | -1.653157 | H                       | -3.996715 | -0.017193 | 0.000256  |
|                         |           |           |           | H                       | -2.832815 | 1.409726  | 0.001404  |
| <b>TS<sub>1b2</sub></b> |           |           |           | H                       | 0.035285  | -2.298888 | 0.000027  |
| C                       | 2.510149  | -0.281370 | 0.242664  | H                       | 2.468081  | -1.880083 | 0.000418  |
| N                       | 3.037282  | 0.491869  | 1.234161  | H                       | 3.328483  | 0.449219  | 0.000324  |
| C                       | 4.419918  | 0.555873  | 1.139688  | H                       | 1.728175  | 2.346468  | -0.000153 |
| H                       | 5.021075  | 1.112409  | 1.842159  | H                       | -0.690982 | 1.931867  | -0.000572 |
| C                       | 4.773141  | -0.183588 | 0.057040  |                         |           |           |           |
| H                       | 5.740574  | -0.386350 | -0.376001 | <b>TS<sub>1c1</sub></b> |           |           |           |
| N                       | 3.597643  | -0.690830 | -0.474740 | C                       | 1.139415  | 1.620003  | -0.261498 |
| C                       | 2.246496  | 1.114517  | 2.290014  | N                       | 1.635669  | 2.765211  | 0.293327  |
| H                       | 2.681453  | 2.085315  | 2.543488  | C                       | 2.879123  | 3.093191  | -0.228013 |
| H                       | 1.226576  | 1.258673  | 1.928140  | H                       | 3.428374  | 3.968487  | 0.083837  |
| H                       | 2.231025  | 0.484127  | 3.185509  | C                       | 3.177386  | 2.132643  | -1.139514 |
| C                       | 3.501358  | -1.542848 | -1.653649 | H                       | 4.039674  | 2.005631  | -1.776235 |
| H                       | 4.261888  | -2.327452 | -1.610009 | N                       | 2.107908  | 1.249394  | -1.147682 |
| H                       | 2.509014  | -1.999809 | -1.655201 | C                       | 0.932575  | 3.538084  | 1.307204  |
| H                       | 3.632645  | -0.958896 | -2.570467 | H                       | 0.858183  | 4.586444  | 1.002066  |
| O                       | -0.765746 | 1.603464  | 0.569280  | H                       | -0.071132 | 3.121619  | 1.406259  |
| O                       | -0.637884 | 1.561585  | -1.720065 | H                       | 1.448476  | 3.477874  | 2.271397  |
| C                       | -1.216386 | 2.900502  | 0.133712  | C                       | 2.025210  | 0.060420  | -1.988524 |
| C                       | -0.877196 | 2.936962  | -1.370803 | H                       | 0.996179  | -0.299304 | -1.961402 |
| B                       | -0.527467 | 0.827010  | -0.556486 | H                       | 2.297069  | 0.314124  | -3.017598 |
| C                       | -1.153774 | -1.042149 | -0.863728 | H                       | 2.684151  | -0.728933 | -1.615080 |
| O                       | -0.487171 | -2.162512 | -0.494706 | O                       | -3.550497 | 1.274695  | -0.558300 |
| H                       | -1.231787 | -0.891783 | -1.953220 | O                       | -3.053023 | -0.903485 | -0.090359 |
| C                       | -2.506628 | -0.839222 | -0.214582 | C                       | -4.809832 | 0.584983  | -0.594208 |
| C                       | -3.491465 | -0.037912 | -0.803635 | C                       | -4.449229 | -0.905754 | -0.430321 |
|                         |           |           |           | B                       | -2.530123 | 0.391870  | -0.224094 |

|                         |           |           |           |                        |           |           |           |
|-------------------------|-----------|-----------|-----------|------------------------|-----------|-----------|-----------|
| C                       | 0.589160  | -0.858013 | 1.942793  | H                      | -1.788802 | -1.491211 | 1.070279  |
| H                       | 1.409223  | -0.303976 | 2.391807  | C                      | -4.816200 | 0.036451  | 0.861158  |
| C                       | 0.979910  | -1.942124 | 1.039777  | H                      | -5.568943 | 1.022772  | -0.901239 |
| C                       | 2.302858  | -2.416662 | 1.048960  | H                      | -3.778979 | -1.035587 | 2.410947  |
| C                       | 0.074473  | -2.513051 | 0.124427  | H                      | -5.696834 | 0.235737  | 1.461010  |
| C                       | 2.708084  | -3.438120 | 0.196525  | Cu                     | 0.345468  | -0.027574 | -0.634715 |
| H                       | 3.014302  | -1.980321 | 1.743483  | C                      | -0.340496 | -1.796658 | -1.179857 |
| C                       | 0.484974  | -3.535313 | -0.725854 | H                      | -0.752542 | -2.583237 | -0.544587 |
| H                       | -0.946500 | -2.152957 | 0.073533  | H                      | 0.152350  | -2.220386 | -2.052685 |
| C                       | 1.798285  | -4.004432 | -0.696561 | H                      | 2.695143  | -2.348043 | 2.436651  |
| H                       | 3.731670  | -3.795982 | 0.230876  | H                      | 4.028876  | -2.923712 | 0.519008  |
| H                       | -0.227146 | -3.965443 | -1.422104 | H                      | 2.867414  | -4.168466 | 0.002569  |
| H                       | 2.109317  | -4.802796 | -1.361256 | H                      | 1.843907  | -3.885805 | 2.160697  |
| Cu                      | -0.609343 | 0.821093  | 0.029277  | <b>1c<sub>2</sub></b>  |           |           |           |
| C                       | -0.675538 | -0.487897 | 2.220806  | C                      | -2.321657 | -0.464796 | -0.043696 |
| H                       | -1.533390 | -1.057092 | 1.893172  | N                      | -3.307486 | 0.475750  | -0.008402 |
| H                       | -0.868156 | 0.322461  | 2.914220  | C                      | -4.468311 | -0.024416 | 0.560905  |
| H                       | -4.592102 | -1.475709 | -1.357072 | H                      | -5.360762 | 0.571236  | 0.678163  |
| H                       | -5.313721 | 0.799595  | -1.543216 | C                      | -4.208369 | -1.313980 | 0.899307  |
| H                       | -5.444106 | 0.954166  | 0.221808  | H                      | -4.828715 | -2.059763 | 1.372543  |
| H                       | -5.016822 | -1.398608 | 0.366721  | N                      | -2.897208 | -1.563011 | 0.523840  |
| <b>1c<sub>1</sub></b>   |           |           |           | C                      | -3.148298 | 1.827007  | -0.534580 |
| C                       | 0.368637  | 1.491248  | -0.004955 | H                      | -3.546448 | 2.552700  | 0.180950  |
| N                       | 1.183256  | 2.467739  | -0.500830 | H                      | -2.082461 | 2.010236  | -0.679981 |
| C                       | 0.990468  | 3.673948  | 0.155668  | H                      | -3.676316 | 1.935034  | -1.487896 |
| H                       | 1.535959  | 4.567745  | -0.105112 | C                      | -2.203099 | -2.831255 | 0.713386  |
| C                       | 0.035149  | 3.455032  | 1.093747  | H                      | -1.173797 | -2.701596 | 0.376063  |
| H                       | -0.409660 | 4.116820  | 1.820786  | H                      | -2.203122 | -3.111197 | 1.771178  |
| N                       | -0.336689 | 2.122768  | 0.975849  | H                      | -2.682064 | -3.622435 | 0.127871  |
| C                       | 2.147396  | 2.246130  | -1.574459 | O                      | 0.232393  | 2.667707  | -0.080236 |
| H                       | 2.806306  | 3.115066  | -1.640450 | O                      | 2.476758  | 2.810678  | 0.338341  |
| H                       | 2.740619  | 1.354353  | -1.354712 | C                      | 0.344237  | 3.505967  | 1.078806  |
| H                       | 1.633616  | 2.118479  | -2.532527 | C                      | 1.867175  | 3.707728  | 1.273974  |
| C                       | -1.293847 | 1.464598  | 1.857328  | B                      | 1.499498  | 2.238512  | -0.444928 |
| H                       | -1.707285 | 0.593823  | 1.350345  | C                      | 1.236977  | -0.193798 | -1.458829 |
| H                       | -0.807451 | 1.148660  | 2.786564  | H                      | 1.191125  | -0.653457 | -2.454313 |
| H                       | -2.108073 | 2.155207  | 2.091424  | C                      | 2.029346  | -1.105092 | -0.586324 |
| O                       | 3.431264  | -0.753954 | -0.409791 | C                      | 1.915041  | -2.504527 | -0.755676 |
| O                       | 2.384546  | -1.943552 | 1.237612  | C                      | 2.902564  | -0.671357 | 0.430210  |
| C                       | 4.489497  | -1.447114 | 0.279160  | C                      | 2.597624  | -3.405357 | 0.049068  |
| C                       | 3.789959  | -2.156075 | 1.458742  | H                      | 1.271583  | -2.876030 | -1.549465 |
| B                       | 2.203066  | -1.098809 | 0.155279  | C                      | 3.583932  | -1.577206 | 1.243617  |
| C                       | -1.231894 | -0.969403 | -1.571702 | H                      | 3.057910  | 0.388861  | 0.590525  |
| H                       | -1.277619 | -0.378267 | -2.481426 | C                      | 3.438234  | -2.950049 | 1.068987  |
| C                       | -2.451590 | -0.929655 | -0.756064 | H                      | 2.484392  | -4.471656 | -0.124107 |
| C                       | -3.474121 | -0.013508 | -1.071227 | H                      | 4.246683  | -1.199083 | 2.016546  |
| C                       | -2.662565 | -1.769235 | 0.356460  | H                      | 3.974277  | -3.650685 | 1.699464  |
| C                       | -4.639246 | 0.065524  | -0.318263 | Cu                     | -0.575085 | -0.296385 | -0.746889 |
| H                       | -3.342287 | 0.643126  | -1.925727 | C                      | 1.777912  | 1.252577  | -1.624192 |
| C                       | -3.828244 | -1.686548 | 1.111268  | H                      | 2.854650  | 1.254301  | -1.854090 |
| H                       | -1.904204 | -2.490270 | 0.638141  | H                      | 1.275126  | 1.679669  | -2.502394 |
| C                       | -4.826312 | -0.768937 | 0.784362  | H                      | 2.202000  | 3.457033  | 2.285491  |
| H                       | -5.408327 | 0.779530  | -0.594628 | H                      | -0.122235 | 2.998324  | 1.931688  |
| H                       | -3.960011 | -2.348771 | 1.960800  | H                      | -0.189111 | 4.445272  | 0.898103  |
| H                       | -5.735230 | -0.710596 | 1.372231  | H                      | 2.187055  | 4.730931  | 1.045381  |
| Cu                      | 0.450804  | -0.382769 | -0.516036 | <b>2</b>               |           |           |           |
| C                       | -0.230551 | -1.959517 | -1.479660 | Cu                     | -1.439043 | 0.000091  | 0.000970  |
| H                       | -0.353009 | -2.816138 | -0.827418 | C                      | 0.448280  | 0.000004  | 0.000690  |
| H                       | 0.391771  | -2.151398 | -2.346818 | N                      | 1.292641  | 1.072554  | 0.000107  |
| H                       | 4.067859  | -1.728487 | 2.429902  | N                      | 1.292547  | -1.072621 | -0.000271 |
| H                       | 5.244468  | -0.722513 | 0.604061  | C                      | 2.622579  | 0.678900  | -0.001228 |
| H                       | 4.964359  | -2.151892 | -0.413981 | C                      | 2.622519  | -0.679085 | -0.001454 |
| H                       | 3.990696  | -3.232565 | 1.487072  | C                      | 0.827665  | -2.453111 | 0.000822  |
| <b>TS<sub>1c2</sub></b> |           |           |           | C                      | 0.827879  | 2.453084  | 0.000667  |
| C                       | 1.141495  | 1.571823  | -0.071216 | H                      | 1.177364  | 2.977976  | -0.894149 |
| N                       | 2.410989  | 2.029565  | -0.281679 | H                      | 3.438475  | 1.385618  | -0.001831 |
| C                       | 2.602434  | 3.269539  | 0.309559  | H                      | 3.438354  | -1.385874 | -0.002163 |
| H                       | 3.536958  | 3.804592  | 0.240411  | H                      | 1.180379  | -2.977953 | 0.894395  |
| C                       | 1.433805  | 3.593871  | 0.920127  | H                      | -0.263298 | -2.426624 | 0.001215  |
| H                       | 1.155720  | 4.460065  | 1.500446  | H                      | 1.179986  | -2.979243 | -0.892137 |
| N                       | 0.553101  | 2.553047  | 0.672860  | H                      | -0.263080 | 2.426694  | 0.004480  |
| C                       | 3.410715  | 1.320119  | -1.068642 | H                      | 1.183516  | 2.979105  | 0.892372  |
| H                       | 4.404322  | 1.519987  | -0.658356 | C                      | -3.360044 | -0.000062 | -0.001609 |
| H                       | 3.205963  | 0.248506  | -1.014713 | H                      | -3.785922 | -0.877593 | -0.514678 |
| H                       | 3.385482  | 1.641059  | -2.115776 | H                      | -3.797059 | -0.001860 | 1.009781  |
| C                       | -0.821099 | 2.479355  | 1.158795  | H                      | -3.786051 | 0.879196  | -0.511604 |
| H                       | -1.411702 | 1.893656  | 0.452066  | <b>TS<sub>2a</sub></b> |           |           |           |
| H                       | -0.863315 | 1.997210  | 2.140467  | Cu                     | 0.720559  | -0.498552 | -0.188750 |
| H                       | -1.234074 | 3.488472  | 1.230515  | C                      | -1.093603 | -0.032772 | -0.038234 |
| O                       | 2.383912  | -2.229855 | -0.544043 | N                      | -2.171923 | -0.852815 | 0.111263  |
| O                       | 0.983550  | -2.220375 | 1.275871  | N                      | -1.622802 | 1.220547  | -0.025604 |
| C                       | 2.964791  | -3.150071 | 0.398431  | C                      | -3.347711 | -0.127314 | 0.214268  |
| C                       | 2.150330  | -2.944377 | 1.694039  | C                      | -2.998744 | 1.182727  | 0.128016  |
| B                       | 1.189596  | -1.757775 | -0.014564 | C                      | -0.841803 | 2.452487  | -0.149237 |
| C                       | -1.324024 | -0.723856 | -1.538040 | C                      | -2.080490 | -2.305662 | 0.157381  |
| H                       | -1.428731 | -0.519589 | -2.597307 | C                      | 2.687726  | 0.463467  | 0.214815  |
| C                       | -2.504929 | -0.499075 | -0.723671 | O                      | 2.248653  | 1.244483  | -0.629994 |
| C                       | -3.616259 | 0.215504  | -1.235967 | O                      | 3.289897  | 0.473706  | 1.253403  |
| C                       | -2.607438 | -0.938415 | 0.620889  | H                      | -4.311391 | -0.597050 | 0.337850  |
| C                       | -4.738122 | 0.476699  | -0.464203 | H                      | -3.600007 | 2.078293  | 0.162332  |
| H                       | -3.581362 | 0.562658  | -2.264592 | H                      | -0.977620 | 3.067776  | 0.745091  |
| C                       | -3.739291 | -0.675341 | 1.387075  | H                      | 0.213116  | 2.194324  | -0.258986 |

|                         |           |           |           |                         |           |           |           |
|-------------------------|-----------|-----------|-----------|-------------------------|-----------|-----------|-----------|
| H                       | -1.171763 | 3.013249  | -1.028780 | H                       | -1.890266 | -0.848154 | 1.999451  |
| H                       | -1.025252 | -2.565523 | 0.061310  | C                       | -4.783068 | 0.663857  | 1.029288  |
| H                       | -2.462829 | -2.685514 | 1.109639  | H                       | -5.402150 | 0.915552  | -1.017525 |
| H                       | -2.643627 | -2.754122 | -0.666819 | H                       | -3.909152 | 0.255753  | 2.953341  |
| C                       | 2.556520  | -1.371587 | -0.365117 | H                       | -5.665547 | 1.141462  | 1.440403  |
| H                       | 3.357601  | -1.245199 | -1.096341 | Cu                      | 0.297678  | -0.085995 | -0.664679 |
| H                       | 2.901200  | -1.973451 | 0.476020  | C                       | -0.207801 | 1.275030  | -1.976470 |
| H                       | 1.787659  | -1.962461 | -0.925793 | H                       | -0.724952 | 0.849718  | -2.848323 |
| <b>2a</b>               |           |           |           | H                       | -0.897948 | 2.013266  | -1.540354 |
| Cu                      | -0.526693 | -0.349653 | 0.015848  | H                       | 0.662042  | 1.825202  | -2.365369 |
| C                       | 1.292211  | -0.003339 | 0.003732  | <b>TS<sub>2b2</sub></b> |           |           |           |
| N                       | 1.949737  | 1.190590  | 0.006296  | C                       | 2.379958  | 0.092879  | 0.055811  |
| N                       | 2.292145  | -0.930681 | -0.011130 | N                       | 3.091776  | 1.234950  | 0.285600  |
| C                       | 3.324603  | 1.011340  | -0.006859 | C                       | 4.422630  | 0.959934  | 0.562561  |
| C                       | 3.540621  | -0.329113 | -0.017784 | H                       | 5.143044  | 1.735241  | 0.774340  |
| C                       | 2.059635  | -2.370609 | -0.018578 | C                       | 4.558860  | -0.390016 | 0.505733  |
| C                       | 1.282814  | 2.486492  | 0.021143  | H                       | 5.422325  | -1.019801 | 0.656450  |
| C                       | -3.333341 | -0.097326 | -0.005109 | N                       | 3.308053  | -0.900142 | 0.200117  |
| O                       | -2.273526 | -0.857943 | 0.028604  | C                       | 2.520416  | 2.573532  | 0.245710  |
| O                       | -4.479942 | -0.504015 | -0.000538 | H                       | 2.991295  | 3.169165  | -0.542931 |
| H                       | 4.016754  | 1.839341  | -0.007081 | H                       | 1.455032  | 2.477843  | 0.037919  |
| H                       | 4.458030  | -0.897379 | -0.029405 | H                       | 2.658066  | 3.076165  | 1.208286  |
| H                       | 2.502933  | -2.834494 | 0.867607  | C                       | 2.990154  | -2.316847 | 0.058009  |
| H                       | 0.980584  | -2.530814 | -0.009253 | H                       | 3.281198  | -2.862405 | 0.960752  |
| H                       | 2.485789  | -2.822592 | -0.919219 | H                       | 1.910717  | -2.395442 | -0.085376 |
| H                       | 0.207381  | 2.306281  | 0.032886  | H                       | 3.508208  | -2.743081 | -0.807018 |
| H                       | 1.565220  | 3.052263  | 0.914139  | C                       | -1.497075 | -0.738633 | -0.894753 |
| H                       | 1.543961  | 3.062138  | -0.872035 | O                       | -0.765202 | -1.600328 | -0.233653 |
| C                       | -3.044554 | 1.415560  | -0.050727 | H                       | -1.632049 | -0.934227 | -1.969786 |
| H                       | -2.434978 | 1.657053  | -0.932335 | C                       | -2.780226 | -0.303819 | -0.231508 |
| H                       | -3.973406 | 1.990016  | -0.090361 | C                       | -3.886268 | 0.122453  | -0.971759 |
| H                       | -2.475537 | 1.716386  | 0.839853  | C                       | -2.894805 | -0.388735 | 1.158496  |
| <b>TS<sub>2b1</sub></b> |           |           |           | C                       | -5.074017 | 0.479062  | -0.338011 |
| C                       | 1.947803  | 0.141494  | -0.108567 | H                       | -3.820428 | 0.167419  | -2.054940 |
| N                       | 2.414290  | 1.368753  | -0.482106 | C                       | -4.077191 | -0.026901 | 1.796233  |
| C                       | 3.628872  | 1.661123  | 0.119050  | H                       | -2.046192 | -0.768379 | 1.714809  |
| H                       | 4.149839  | 2.592220  | -0.043855 | C                       | -5.171532 | 0.411741  | 1.050832  |
| C                       | 3.942609  | 0.586655  | 0.887530  | H                       | -5.925605 | 0.802305  | -0.927380 |
| H                       | 4.796829  | 0.393931  | 1.518536  | H                       | -4.151613 | -0.096958 | 2.876529  |
| N                       | 2.908919  | -0.324097 | 0.737280  | H                       | -6.095800 | 0.687643  | 1.546834  |
| C                       | 1.703386  | 2.264177  | -1.385168 | Cu                      | 0.589967  | -0.192084 | -0.355647 |
| H                       | 2.378267  | 2.622558  | -2.168311 | C                       | -0.813563 | 1.198565  | -1.349579 |
| H                       | 0.887937  | 1.698765  | -1.838681 | H                       | -1.702049 | 1.321969  | -1.969220 |
| H                       | 1.292282  | 3.120573  | -0.840711 | H                       | -0.890794 | 1.924887  | -0.529058 |
| C                       | 2.873209  | -1.638244 | 1.372240  | H                       | 0.044371  | 1.447767  | -1.993882 |
| H                       | 3.251882  | -1.556662 | 2.394846  | <b>2b<sub>2</sub></b>   |           |           |           |
| H                       | 1.836737  | -1.975474 | 1.399701  | C                       | 2.199268  | 0.180060  | -0.030873 |
| H                       | 3.492531  | -2.349599 | 0.815216  | N                       | 2.301181  | 1.429357  | -0.570333 |
| C                       | -1.202654 | -1.452437 | 0.648766  | C                       | 3.613669  | 1.875523  | -0.573864 |
| O                       | -0.271391 | -1.383358 | 1.468831  | H                       | 3.895974  | 2.842051  | -0.962350 |
| H                       | -1.448704 | -2.406737 | 0.157648  | C                       | 4.361532  | 0.885518  | -0.022267 |
| C                       | -2.254484 | -0.406949 | 0.556628  | H                       | 5.422483  | 0.821437  | 0.165025  |
| C                       | -3.385644 | -0.602327 | -0.243391 | N                       | 3.484562  | -0.138299 | 0.301356  |
| C                       | -2.152237 | 0.756064  | 1.329719  | C                       | 1.163789  | 2.187901  | -1.077556 |
| C                       | -4.392493 | 0.355884  | -0.282375 | H                       | 1.276666  | 2.377348  | -2.149545 |
| H                       | -3.462272 | -1.502088 | -0.843884 | H                       | 0.264171  | 1.595267  | -0.906666 |
| C                       | -3.156798 | 1.715161  | 1.286901  | H                       | 1.073317  | 3.140562  | -0.547099 |
| H                       | -1.278910 | 0.878559  | 1.959191  | C                       | 3.869637  | -1.399780 | 0.920665  |
| C                       | -4.279360 | 1.518216  | 0.480711  | H                       | 4.299009  | -1.226970 | 1.912445  |
| H                       | -5.265291 | 0.199458  | -0.906512 | H                       | 2.968723  | -2.007335 | 1.017747  |
| H                       | -3.074071 | 2.613883  | 1.888636  | H                       | 4.597486  | -1.926387 | 0.295711  |
| H                       | -5.065143 | 2.265056  | 0.451760  | C                       | -1.914027 | -1.744699 | -0.227343 |
| Cu                      | 0.336628  | -0.716937 | -0.800513 | O                       | -0.764517 | -1.893479 | 0.525366  |
| C                       | -0.704976 | -1.237720 | -2.355461 | H                       | -2.603499 | -2.572485 | 0.022281  |
| H                       | -1.229222 | -2.200771 | -2.263534 | C                       | -2.692401 | -0.451682 | 0.077538  |
| H                       | -1.468542 | -0.485292 | -2.604223 | C                       | -3.946900 | -0.197743 | -0.491363 |
| H                       | -0.051091 | -1.329512 | -3.237310 | C                       | -2.162338 | 0.500426  | 0.949799  |
| <b>2b<sub>1</sub></b>   |           |           |           | C                       | -4.640142 | 0.976136  | -0.209637 |
| C                       | 2.120039  | 0.108458  | 0.070735  | H                       | -4.392525 | -0.931262 | -1.156726 |
| N                       | 2.779622  | 1.246340  | 0.423621  | C                       | -2.853512 | 1.677088  | 1.239385  |
| C                       | 4.077669  | 0.977942  | 0.831382  | H                       | -1.216067 | 0.272567  | 1.425079  |
| H                       | 4.754447  | 1.752158  | 1.159295  | C                       | -4.093318 | 1.924059  | 0.656336  |
| C                       | 4.242991  | -0.365494 | 0.728367  | H                       | -5.611746 | 1.150982  | -0.660518 |
| H                       | 5.095880  | -0.992419 | 0.939387  | H                       | -2.426710 | 2.396921  | 1.931126  |
| N                       | 3.039541  | -0.876575 | 0.267855  | H                       | -4.635282 | 2.836349  | 0.881544  |
| C                       | 2.187520  | 2.579002  | 0.415032  | Cu                      | 0.675851  | -0.842447 | 0.205115  |
| H                       | 2.820333  | 3.265819  | -0.154996 | C                       | -1.622625 | -1.847396 | -1.741665 |
| H                       | 1.208528  | 2.514936  | -0.058352 | H                       | -2.527125 | -1.835160 | -2.363513 |
| H                       | 2.077586  | 2.954002  | 1.437772  | H                       | -0.986181 | -1.006120 | -2.052457 |
| C                       | 2.796952  | -2.292635 | 0.002761  | H                       | -1.078213 | -2.778825 | -1.935439 |
| H                       | 3.147987  | -2.888911 | 0.849918  | <b>TS<sub>2e1</sub></b> |           |           |           |
| H                       | 1.723301  | -2.439538 | -0.120825 | Cu                      | -0.936114 | 1.326060  | -0.410416 |
| H                       | 3.327990  | -2.606626 | -0.902214 | C                       | 0.337658  | 2.124293  | 1.415472  |
| C                       | -1.305496 | -1.242778 | -0.595032 | C                       | 0.782065  | 0.861635  | 1.615048  |
| O                       | -0.382157 | -1.724335 | 0.171305  | C                       | -3.360432 | -0.157200 | 1.404624  |
| H                       | -1.438757 | -1.668537 | -1.599862 | C                       | -1.527832 | -0.507055 | -0.240615 |
| C                       | -2.502575 | -0.573805 | -0.032959 | N                       | -2.567696 | -0.984682 | 0.508053  |
| C                       | -3.505431 | -0.081780 | -0.878269 | N                       | -1.087498 | -1.611702 | -0.911468 |
| C                       | -2.661457 | -0.445929 | 1.353227  | C                       | -2.761621 | -2.345138 | 0.313223  |
| C                       | -4.634820 | 0.535265  | -0.351918 | C                       | -1.823791 | -2.740955 | -0.584016 |
| H                       | -3.388497 | -0.177216 | -1.952902 | C                       | 0.038265  | -1.601751 | -1.837523 |
| C                       | -3.792919 | 0.168489  | 1.878200  | H                       | -3.540794 | -2.899292 | 0.814103  |



|                                    |           |           |           |                        |           |           |           |
|------------------------------------|-----------|-----------|-----------|------------------------|-----------|-----------|-----------|
| H                                  | -1.622731 | -3.709539 | -1.015797 | H                      | 3.777819  | 0.927132  | 2.305540  |
| H                                  | -0.209315 | -2.188450 | -2.727241 | H                      | 5.030010  | 2.177678  | 0.554780  |
| H                                  | 0.937682  | -2.007967 | -1.365092 | H                      | 2.801524  | 0.082579  | -2.441915 |
| H                                  | 0.227231  | -0.566741 | -2.124932 | C                      | -0.725759 | -2.619556 | 1.282534  |
| H                                  | -3.071039 | 0.881919  | 1.240233  | H                      | -0.736136 | -1.956424 | 2.156719  |
| H                                  | -3.174550 | -0.424618 | 2.450443  | H                      | -0.368625 | -3.595936 | 1.613471  |
| H                                  | -4.426930 | -0.272504 | 1.187359  | H                      | -1.753159 | -2.763841 | 0.922173  |
| H                                  | -0.469079 | 2.518797  | 2.021276  | <b>2c<sub>2</sub></b>  |           |           |           |
| H                                  | 0.908489  | 2.853161  | 0.857569  | Cu                     | 0.390963  | 0.576945  | -0.394016 |
| C                                  | 1.912392  | 0.237076  | 0.930994  | C                      | -1.641268 | 2.731250  | -0.136333 |
| C                                  | 2.496323  | 0.798622  | -0.220773 | C                      | -1.361336 | 1.355624  | -0.759722 |
| C                                  | 3.572097  | 0.180465  | -0.848099 | C                      | 3.563886  | 1.649067  | -0.328274 |
| C                                  | 4.088134  | -1.018433 | -0.355168 | C                      | 2.034807  | -0.284241 | -0.025015 |
| C                                  | 2.435971  | -0.978727 | 1.405375  | N                      | 3.288623  | 0.251156  | -0.023404 |
| C                                  | 3.510429  | -1.596801 | 0.775382  | N                      | 2.236639  | -1.589971 | 0.310076  |
| H                                  | 2.087671  | 1.712447  | -0.634438 | C                      | 4.246991  | -0.695423 | 0.304705  |
| H                                  | 3.901513  | -2.529239 | 1.168408  | C                      | 3.580732  | -1.860053 | 0.515671  |
| H                                  | 0.251530  | 0.226500  | 2.318354  | C                      | 1.163605  | -2.570392 | 0.441111  |
| H                                  | 4.006967  | 0.633294  | -1.732800 | H                      | 5.299591  | -0.462811 | 0.358541  |
| H                                  | 4.928261  | -1.496162 | -0.846507 | H                      | 3.940130  | -2.840124 | 0.790001  |
| H                                  | 1.994074  | -1.433764 | 2.286330  | H                      | 1.125261  | -2.958681 | 1.463422  |
| C                                  | -0.912469 | 3.081378  | -1.250474 | H                      | 1.318505  | -3.398877 | -0.256789 |
| H                                  | 0.096136  | 3.385143  | -1.577967 | H                      | 0.220077  | -2.074473 | 0.209330  |
| H                                  | -1.267627 | 3.883930  | -0.584435 | H                      | 2.606007  | 2.132445  | -0.527438 |
| H <sub>1</sub>                     | -1.546950 | 3.127574  | -2.149603 | H                      | 4.204867  | 1.731970  | -1.211601 |
| <b>2c<sub>1</sub></b>              |           |           |           | H                      | 4.049675  | 2.139109  | 0.521194  |
| Cu                                 | -0.728503 | -1.268354 | 0.150419  | H                      | -1.278475 | 3.497370  | -0.831356 |
| C                                  | 0.580596  | -2.602758 | -0.467360 | H                      | -2.724699 | 2.907453  | -0.043033 |
| C                                  | 0.931181  | -1.379757 | -1.066456 | C                      | -2.264096 | 0.231452  | -0.373395 |
| C                                  | -3.475192 | -0.064111 | -1.291267 | C                      | -3.094207 | 0.228688  | 0.764404  |
| C                                  | -1.479953 | 0.542966  | 0.065832  | C                      | -3.896729 | -0.866128 | 1.085597  |
| N                                  | -2.669937 | 0.870566  | -0.516771 | C                      | -3.915789 | -2.001439 | 0.281260  |
| N                                  | -1.076866 | 1.706866  | 0.649643  | C                      | -2.308767 | -0.932670 | -1.176709 |
| C                                  | -2.997576 | 2.202056  | -0.303004 | C                      | -3.114047 | -2.018573 | -0.863802 |
| C                                  | -1.993258 | 2.728965  | 0.440684  | H                      | -3.119664 | 1.097324  | 1.411288  |
| C                                  | 0.119883  | 1.848916  | 1.470646  | H                      | -3.125159 | -2.884036 | -1.519956 |
| H                                  | -3.898561 | 2.648050  | -0.695574 | H                      | -1.411418 | 1.449238  | -1.852378 |
| H                                  | -1.851373 | 3.722696  | 0.837030  | H                      | -4.521248 | -0.822676 | 1.973002  |
| H                                  | -0.138793 | 1.823225  | 2.534665  | H                      | -4.544753 | -2.848656 | 0.530568  |
| H                                  | 0.614156  | 2.796432  | 1.240446  | H                      | -1.698494 | -0.961239 | -2.076095 |
| H                                  | 0.805564  | 1.034268  | 1.242238  | C                      | -0.983709 | 2.993521  | 1.227759  |
| H                                  | -3.260685 | -1.074770 | -0.939914 | H                      | -1.292593 | 2.258097  | 1.980625  |
| H                                  | -3.244877 | 0.009361  | -2.359690 | H                      | -1.232078 | 3.991515  | 1.614444  |
| H                                  | -4.535910 | 0.151345  | -1.137157 | H                      | 0.109279  | 2.923255  | 1.142462  |
| H                                  | 0.063297  | -3.350334 | -1.058614 | <b>TS<sub>3a</sub></b> |           |           |           |
| H                                  | 1.155253  | -3.008812 | 0.357412  | C                      | -2.797475 | 0.209126  | -0.265670 |
| C                                  | 2.035491  | -0.506974 | -0.639653 | N                      | -4.040509 | -0.353259 | -0.235652 |
| C                                  | 2.809686  | -0.749202 | 0.511458  | C                      | -4.939280 | 0.363453  | -1.008633 |
| C                                  | 3.832666  | 0.115364  | 0.887681  | H                      | -5.975001 | 0.077094  | -1.109495 |
| C                                  | 4.125170  | 1.246719  | 0.126720  | C                      | -4.249122 | 1.406676  | -1.539026 |
| C                                  | 2.351802  | 0.636490  | -1.397116 | H                      | -4.566966 | 2.205028  | -2.192089 |
| C                                  | 3.377502  | 1.497044  | -1.024145 | N                      | -2.947732 | 1.296873  | -1.074871 |
| H                                  | 2.611647  | -1.623759 | 1.120031  | C                      | -4.361675 | -1.555837 | 0.526585  |
| H                                  | 3.597509  | 2.365926  | -1.635827 | H                      | -4.646853 | -2.370730 | -0.146062 |
| H                                  | 0.590442  | -1.200428 | -2.082266 | H                      | -3.471680 | -1.842324 | 1.088978  |
| H                                  | 4.412500  | -0.101378 | 1.778896  | H                      | -5.181837 | -1.354553 | 1.222067  |
| H                                  | 4.927086  | 1.914848  | 0.419361  | C                      | -1.863137 | 2.213383  | -1.403318 |
| H                                  | 1.776064  | 0.845611  | -2.293483 | H                      | -2.144683 | 3.239085  | -1.145072 |
| C                                  | -1.877308 | -2.300365 | 1.404524  | H                      | -0.987562 | 1.920490  | -0.821319 |
| H                                  | -1.470619 | -2.205523 | 2.424145  | H                      | -1.626780 | 2.161667  | -2.471151 |
| H                                  | -1.932520 | -3.376492 | 1.192499  | O                      | 1.221340  | 2.143762  | 0.409662  |
| H                                  | -2.910120 | -1.922133 | 1.452289  | O                      | 3.375218  | 1.828786  | 1.125758  |
| <b>TS<sub>2c<sub>2</sub></sub></b> |           |           |           | C                      | 1.777683  | 3.466984  | 0.521374  |
| Cu                                 | -0.507341 | -0.895447 | -0.111197 | C                      | 3.266746  | 3.241554  | 0.888449  |
| C                                  | 0.844300  | -2.500753 | 0.050029  | B                      | 2.184066  | 1.242665  | 0.799005  |
| C                                  | 1.271887  | -1.419634 | -0.847985 | C                      | 1.971275  | -0.320656 | 0.815711  |
| C                                  | -3.876119 | -0.895282 | -0.635753 | O                      | 0.617133  | -0.617469 | 1.170686  |
| C                                  | -1.849397 | 0.422347  | -0.028001 | H                      | 2.605732  | -0.781231 | 1.579287  |
| N                                  | -3.193576 | 0.333878  | -0.262855 | C                      | 2.350263  | -0.894846 | -0.543031 |
| N                                  | -1.658868 | 1.744778  | 0.257679  | C                      | 3.662551  | -1.302981 | -0.798986 |
| C                                  | -3.818626 | 1.564911  | -0.125279 | C                      | 1.410213  | -0.970228 | -1.575078 |
| C                                  | -2.848737 | 2.453516  | 0.208690  | C                      | 4.026205  | -1.779984 | -2.055992 |
| C                                  | -0.359119 | 2.326475  | 0.578637  | H                      | 4.399675  | -1.254924 | -0.004198 |
| H                                  | -4.877969 | 1.698896  | -0.282484 | C                      | 1.770135  | -1.453510 | -2.829925 |
| H                                  | -2.899034 | 3.513240  | 0.406693  | H                      | 0.390010  | -0.661153 | -1.376876 |
| H                                  | -0.228097 | 2.416751  | 1.661851  | C                      | 3.080682  | -1.858071 | -3.076793 |
| H                                  | -0.278658 | 3.316095  | 0.121188  | H                      | 5.046267  | -2.102424 | -2.234553 |
| H                                  | 0.421564  | 1.679241  | 0.176714  | H                      | 1.025280  | -1.515565 | -3.616273 |
| H                                  | -3.129946 | -1.687678 | -0.694711 | H                      | 3.361145  | -2.236630 | -4.053439 |
| H                                  | -4.359904 | -0.785476 | -1.611772 | Cu                     | -1.300386 | -0.409468 | 0.622302  |
| H                                  | -4.629028 | -1.162829 | 0.112615  | H                      | 1.230912  | 4.013816  | 1.297249  |
| H                                  | 0.585927  | -3.419156 | -0.468346 | H                      | 1.650371  | 3.989226  | -0.432119 |
| H                                  | 1.512377  | -2.684640 | 0.888041  | H                      | 3.946470  | 3.515540  | 0.074430  |
| C                                  | 2.285020  | -0.453673 | -0.451365 | H                      | 3.567961  | 3.779057  | 1.792447  |
| C                                  | 2.591426  | -0.176020 | 0.902070  | C                      | 0.323437  | -1.741443 | 2.168869  |
| C                                  | 3.567415  | 0.751117  | 1.254330  | O                      | 1.268193  | -2.252526 | 2.709191  |
| C                                  | 4.271289  | 1.454436  | 0.277828  | O                      | -0.917497 | -1.835960 | 2.176310  |
| C                                  | 3.010687  | 0.271456  | -1.419734 | <b>3a</b>              |           |           |           |
| C                                  | 3.973487  | 1.197533  | -1.062814 | C                      | -1.798274 | 2.172214  | 0.541274  |
| H                                  | 2.055028  | -0.687574 | 1.695167  | N                      | -1.010630 | 2.533296  | 1.592668  |
| H                                  | 4.510312  | 1.727865  | -1.843616 | C                      | -1.435746 | 3.723874  | 2.159126  |
| H                                  | 1.219461  | -1.639799 | -1.910269 |                        |           |           |           |

|                        |           |           |           |                        |           |           |           |
|------------------------|-----------|-----------|-----------|------------------------|-----------|-----------|-----------|
| H                      | -0.939191 | 4.172942  | 3.005726  | H                      | -1.107865 | 4.988556  | -2.721660 |
| C                      | -2.522096 | 4.126384  | 1.449123  | C                      | -0.746435 | -1.321831 | -1.893910 |
| H                      | -3.155856 | 4.993504  | 1.556180  | O                      | 0.458094  | -1.772256 | -1.953729 |
| N                      | -2.727300 | 3.167721  | 0.468744  | H                      | -1.189896 | -0.896762 | -2.815591 |
| C                      | 0.123417  | 1.738162  | 2.057559  | C                      | -1.771058 | -2.125181 | -1.123691 |
| H                      | -0.026458 | 1.439034  | 3.099133  | C                      | -3.109697 | -2.160296 | -1.511546 |
| H                      | 0.195031  | 0.846445  | 1.435321  | C                      | -1.367593 | -2.870150 | -0.012613 |
| H                      | 1.052238  | 2.309470  | 1.971068  | C                      | -4.037283 | -2.921467 | -0.798308 |
| C                      | -3.800668 | 3.192836  | -0.515466 | H                      | -3.426883 | -1.599155 | -2.385970 |
| H                      | -3.698099 | 4.057387  | -1.179182 | C                      | -2.285951 | -3.626513 | 0.702762  |
| H                      | -3.727306 | 2.274113  | -1.099647 | H                      | -0.318915 | -2.847176 | 0.260177  |
| H                      | -4.774935 | 3.229377  | -0.018452 | C                      | -3.627226 | -3.653493 | 0.311866  |
| O                      | 2.269618  | -0.724506 | 2.050241  | H                      | -5.075634 | -2.944908 | -1.111660 |
| O                      | 3.835622  | -2.144003 | 1.165431  | H                      | -1.962820 | -4.198764 | 1.566064  |
| C                      | 3.083477  | -1.127564 | 3.166474  | H                      | -4.344713 | -4.245933 | 0.869275  |
| C                      | 4.209652  | -1.993515 | 2.545546  | <b>3b</b>              |           |           |           |
| B                      | 2.734814  | -1.363088 | 0.931467  | C                      | 3.176926  | 0.482538  | -0.011600 |
| C                      | 2.126190  | -1.196654 | -0.519021 | N                      | 4.417528  | 0.059193  | 0.369372  |
| O                      | 0.717338  | -1.019994 | -0.429152 | C                      | 5.049129  | 0.997996  | 1.170072  |
| H                      | 2.354993  | -2.114657 | -1.081785 | H                      | 6.039921  | 0.847144  | 1.570559  |
| C                      | 2.829947  | -0.030340 | -1.217426 | C                      | 4.186056  | 2.039384  | 1.297618  |
| C                      | 4.148606  | -0.164045 | -1.666703 | H                      | 4.278895  | 2.972196  | 1.832513  |
| C                      | 2.186048  | 1.199402  | -1.378498 | N                      | 3.053392  | 1.709205  | 0.571624  |
| C                      | 4.808174  | 0.906565  | -2.264477 | C                      | 4.985210  | -1.222778 | -0.025130 |
| H                      | 4.660334  | -1.113722 | -1.545635 | H                      | 5.178199  | -1.846122 | 0.853672  |
| C                      | 2.844468  | 2.268660  | -1.982807 | H                      | 4.254925  | -1.717420 | -0.667719 |
| H                      | 1.159589  | 1.296460  | -1.043196 | H                      | 5.917529  | -1.076386 | -0.579342 |
| C                      | 4.157748  | 2.129126  | -2.425866 | C                      | 1.869828  | 2.555485  | 0.438238  |
| H                      | 5.828702  | 0.784116  | -2.611287 | H                      | 2.147689  | 3.524674  | 0.012914  |
| H                      | 2.325997  | 3.212989  | -2.111461 | H                      | 1.160949  | 2.058196  | -0.223729 |
| H                      | 4.668181  | 2.961554  | -2.897431 | H                      | 1.397053  | 2.704920  | 1.413304  |
| Cu                     | -1.623266 | 0.621610  | -0.525167 | O                      | -1.288867 | 2.882766  | -0.979261 |
| H                      | 2.460426  | -1.688523 | 3.871337  | O                      | -3.487711 | 2.304837  | -1.267042 |
| H                      | 3.464598  | -0.233714 | 3.670155  | C                      | -1.933043 | 4.081369  | -1.443184 |
| H                      | 5.189782  | -1.507065 | 2.593961  | C                      | -3.438143 | 3.718116  | -1.525571 |
| H                      | 4.286877  | -2.984194 | 3.003333  | B                      | -2.228312 | 1.885590  | -0.923045 |
| C                      | -1.459009 | -1.029443 | -1.554973 | C                      | -1.918897 | 0.405092  | -0.456926 |
| C                      | 0.009842  | -1.379655 | -1.653825 | O                      | -0.627016 | 0.018159  | -0.928948 |
| C                      | -2.330504 | -2.046790 | -0.900593 | H                      | -2.690706 | -0.258884 | -0.865104 |
| C                      | -3.658596 | -2.242486 | -1.328025 | C                      | -2.007368 | 0.333326  | 1.066641  |
| C                      | -4.495788 | -3.172003 | -0.722262 | C                      | -3.227038 | 0.560772  | 1.715752  |
| C                      | -4.035672 | -3.956034 | 0.336509  | C                      | -0.872799 | 0.076653  | 1.838588  |
| C                      | -2.722903 | -3.785424 | 0.772217  | C                      | -3.310222 | 0.524250  | 3.104726  |
| C                      | -1.887038 | -2.848793 | 0.169709  | H                      | -4.116467 | 0.762792  | 1.126809  |
| H                      | -1.829326 | -0.838085 | -2.569038 | C                      | -0.956633 | 0.040166  | 3.229380  |
| H                      | 0.464784  | -0.832402 | -2.487490 | H                      | 0.062035  | -0.108662 | 1.325457  |
| H                      | 0.188584  | -2.456159 | -1.814555 | C                      | -2.173201 | 0.264396  | 3.869109  |
| H                      | -4.032072 | -1.648500 | -2.157922 | H                      | -4.265028 | 0.692874  | 3.591429  |
| H                      | -5.511787 | -3.294995 | -1.085426 | H                      | -0.067554 | -0.172289 | 3.814109  |
| H                      | -4.685785 | -4.684531 | 0.808291  | H                      | -2.238003 | 0.231737  | 4.951154  |
| H                      | -2.344154 | -4.386390 | 1.593730  | Cu                     | 1.921220  | -0.394292 | -1.047824 |
| H                      | -0.877252 | -2.711653 | 0.539159  | H                      | -1.512194 | 4.353458  | -2.417358 |
|                        |           |           |           | H                      | -1.731161 | 4.892138  | -0.735942 |
|                        |           |           |           | H                      | -4.037876 | 4.236087  | -0.769280 |
| <b>TS<sub>3b</sub></b> |           |           |           | H                      | -3.870949 | 3.916140  | -2.510855 |
| C                      | 3.062173  | -0.460198 | 0.181579  | C                      | -0.510423 | -1.194355 | -1.801372 |
| N                      | 3.944688  | -1.502330 | 0.221501  | O                      | 0.767371  | -1.265175 | -2.182896 |
| C                      | 5.115015  | -1.152245 | 0.874987  | H                      | -1.202179 | -1.017828 | -2.648346 |
| H                      | 5.935629  | -1.841162 | 1.005433  | C                      | -0.988680 | -2.430379 | -1.034579 |
| C                      | 4.972685  | 0.143773  | 1.257278  | C                      | -2.230696 | -3.011080 | -1.286337 |
| H                      | 5.644817  | 0.802056  | 1.786351  | C                      | -0.154231 | -3.020992 | -0.081637 |
| N                      | 3.718886  | 0.548116  | 0.825949  | C                      | -2.643589 | -4.150028 | -0.591745 |
| C                      | 3.669621  | -2.808128 | -0.369302 | H                      | -2.877002 | -2.579301 | -2.045452 |
| H                      | 3.659055  | -3.583065 | 0.403930  | C                      | -0.558590 | -4.151706 | 0.615481  |
| H                      | 2.691361  | -2.757460 | -0.851322 | H                      | 0.826063  | -2.586391 | 0.080044  |
| H                      | 4.429771  | -3.053538 | -1.117306 | C                      | -1.809853 | -4.720145 | 0.364705  |
| C                      | 3.151134  | 1.873892  | 1.032679  | H                      | -3.611891 | -4.591843 | -0.802156 |
| H                      | 3.828199  | 2.639445  | 0.640218  | H                      | 0.100126  | -4.597450 | 1.353686  |
| H                      | 2.201112  | 1.920760  | 0.497844  | H                      | -2.125309 | -5.605225 | 0.906595  |
| H                      | 2.978246  | 2.057061  | 2.098345  |                        |           |           |           |
| O                      | 0.228889  | 2.935058  | -0.693051 | <b>TS<sub>3c</sub></b> |           |           |           |
| O                      | -1.820978 | 3.394310  | -1.607947 | C                      | 1.199452  | -2.100943 | -0.115873 |
| C                      | 0.334054  | 4.279177  | -1.193093 | N                      | 0.424007  | -3.224454 | -0.038474 |
| C                      | -1.091861 | 4.630083  | -1.688026 | C                      | 1.193168  | -4.376405 | -0.024424 |
| B                      | -1.027281 | 2.463160  | -0.992570 | H                      | 0.758558  | -5.362964 | 0.027893  |
| C                      | -1.522155 | 1.004503  | -0.639007 | C                      | 2.489034  | -3.975855 | -0.084091 |
| O                      | -0.505030 | 0.079354  | -1.013881 | H                      | 3.406674  | -4.543996 | -0.084233 |
| H                      | -2.427669 | 0.795575  | -1.222989 | N                      | 2.473140  | -2.592073 | -0.141394 |
| C                      | -1.895735 | 0.946090  | 0.839182  | C                      | -1.033704 | -3.206816 | -0.011943 |
| C                      | -3.147365 | 1.397208  | 1.271588  | H                      | -1.394911 | -3.998674 | 0.650586  |
| C                      | -0.976222 | 0.507631  | 1.794659  | H                      | -1.363215 | -2.240592 | 0.370867  |
| C                      | -3.473633 | 1.405642  | 2.625368  | H                      | -1.444867 | -3.364915 | -1.014681 |
| H                      | -3.874468 | 1.736424  | 0.539939  | C                      | 3.672283  | -1.763580 | -0.186654 |
| C                      | -1.301593 | 0.511588  | 3.148325  | H                      | 4.304570  | -2.064005 | -1.027531 |
| H                      | -0.010409 | 0.149382  | 1.457931  | H                      | 3.372009  | -0.725481 | -0.319122 |
| C                      | -2.550648 | 0.962262  | 3.571009  | H                      | 4.238848  | -1.858446 | 0.744944  |
| H                      | -4.453023 | 1.748939  | 2.941283  | O                      | -2.089708 | -0.574506 | 1.886081  |
| H                      | -0.578085 | 0.157023  | 3.875103  | O                      | -2.613945 | 1.462978  | 2.791669  |
| H                      | -2.805097 | 0.961971  | 4.625179  | C                      | -2.329153 | -0.837920 | 3.279365  |
| Cu                     | 1.387733  | -0.506807 | -0.600449 | C                      | -2.758492 | 0.528731  | 3.873456  |
| H                      | 1.074994  | 4.298371  | -2.000096 | B                      | -2.237475 | 0.776056  | 1.669056  |
| H                      | 0.676598  | 4.935349  | -0.386698 | C                      | -1.968934 | 1.467832  | 0.276243  |
| H                      | -1.586333 | 5.372291  | -1.051886 |                        |           |           |           |

|           |           |           |           |                          |           |           |           |
|-----------|-----------|-----------|-----------|--------------------------|-----------|-----------|-----------|
| O         | -0.601867 | 1.224674  | -0.037228 | C                        | 0.408518  | 0.000007  | -0.002361 |
| H         | -2.111840 | 2.550673  | 0.412058  | N                        | 1.251228  | -1.074124 | 0.003890  |
| C         | -2.952285 | 1.005337  | -0.793440 | N                        | 1.251284  | 1.074096  | 0.004212  |
| C         | -4.235982 | 1.560738  | -0.858476 | C                        | 2.580430  | -0.679220 | 0.014289  |
| C         | -2.616403 | 0.001880  | -1.705289 | C                        | 2.580464  | 0.679118  | 0.014499  |
| C         | -5.158658 | 1.122306  | -1.804391 | C                        | 0.779810  | -2.452351 | -0.006707 |
| H         | -4.510522 | 2.350109  | -0.164454 | C                        | 0.779685  | -2.452363 | -0.006538 |
| C         | -3.535150 | -0.434918 | -2.657233 | H                        | 1.137304  | -2.989044 | 0.877943  |
| H         | -1.619147 | -0.419933 | -1.666336 | H                        | 3.396518  | -1.385574 | 0.020753  |
| C         | -4.811705 | 0.120462  | -2.709993 | H                        | 3.396590  | 1.385426  | 0.021096  |
| H         | -6.146120 | 1.569953  | -1.842118 | H                        | 1.118421  | 2.969607  | -0.909952 |
| H         | -3.250169 | -1.207095 | -3.364346 | H                        | -0.311366 | 2.415893  | 0.004345  |
| H         | -5.525826 | -0.216310 | -3.453227 | H                        | 1.139072  | 2.989824  | 0.876617  |
| Cu        | 0.617000  | -0.326813 | -0.270439 | H                        | -0.311505 | -2.415832 | 0.002597  |
| H         | -1.407611 | -1.221733 | 3.730074  | H                        | 1.119917  | -2.970473 | -0.908675 |
| H         | -3.107723 | -1.602415 | 3.368271  | O                        | -3.219293 | -0.000160 | -0.071977 |
| H         | -3.801559 | 0.534042  | 4.207284  | H                        | -3.659359 | 0.000919  | 0.786907  |
| H         | -2.123516 | 0.847249  | 4.705905  |                          |           |           |           |
| C         | 1.487117  | 1.522114  | -1.478847 | <b>3a<sub>1</sub>'</b>   |           |           |           |
| C         | 0.284950  | 2.213559  | -1.247641 | C                        | -1.225657 | -0.028620 | 0.007929  |
| C         | 2.702956  | 1.819747  | -0.734700 | N                        | -1.639112 | 1.269048  | 0.028240  |
| C         | 3.981035  | 1.656401  | -1.314687 | C                        | -3.021498 | 1.355152  | 0.065653  |
| C         | 5.145574  | 1.940740  | -0.610200 | H                        | -3.540920 | 2.300965  | 0.086180  |
| C         | 5.087912  | 2.402291  | 0.705803  | C                        | -3.493357 | 0.081554  | 0.068509  |
| C         | 3.836310  | 2.561791  | 1.303546  | H                        | -4.502782 | -0.299497 | 0.091560  |
| C         | 2.670289  | 2.264624  | 0.608373  | N                        | -2.383423 | -0.748664 | 0.032689  |
| H         | 1.617318  | 1.060505  | -2.454093 | C                        | -0.734307 | 2.418502  | 0.012133  |
| H         | -0.453728 | 2.220630  | -2.042827 | H                        | -0.868292 | 3.012277  | 0.921456  |
| H         | 0.294818  | 3.121298  | -0.649272 | H                        | 0.294031  | 2.056017  | -0.038734 |
| H         | 4.046494  | 1.321525  | -2.346074 | H                        | -0.940859 | 3.042950  | -0.862098 |
| H         | 6.108109  | 1.815303  | -1.097162 | C                        | -2.427035 | -2.203819 | 0.016475  |
| H         | 5.995718  | 2.630271  | 1.252791  | H                        | -2.960453 | -2.564033 | -0.868644 |
| H         | 3.769233  | 2.908216  | 2.330490  | H                        | -1.395200 | -2.557370 | -0.013799 |
| H         | 1.709213  | 2.351905  | 1.103233  | H                        | -2.917476 | -2.585604 | 0.917332  |
|           |           |           |           | O                        | 2.299495  | -1.098180 | -0.141661 |
| <b>3c</b> |           |           |           | Cu                       | 0.523587  | -0.618161 | -0.055356 |
| C         | -1.798274 | 2.172214  | 0.541274  | C                        | 3.242011  | 0.363377  | 0.014874  |
| N         | -1.010630 | 2.533296  | 1.592668  | O                        | 4.346005  | 0.070361  | 0.357028  |
| C         | -1.435746 | 3.723874  | 2.159126  | O                        | 2.478400  | 1.251379  | -0.270548 |
| H         | -0.939191 | 4.172942  | 3.005726  | H                        | 2.773528  | -1.827087 | 0.273574  |
| C         | -2.522096 | 4.126384  | 1.449123  |                          |           |           |           |
| H         | -3.155856 | 4.993504  | 1.556180  | <b>TS<sub>3a1'</sub></b> |           |           |           |
| N         | -2.727300 | 3.167721  | 0.468744  | C                        | -1.215231 | -0.023606 | 0.000664  |
| C         | 0.123417  | 1.738162  | 2.057559  | N                        | -1.846133 | 1.184669  | 0.002491  |
| H         | -0.026458 | 1.439034  | 3.099133  | C                        | -3.223798 | 1.034789  | 0.004144  |
| H         | 0.195031  | 0.846445  | 1.435321  | H                        | -3.898101 | 1.877515  | 0.005756  |
| H         | 1.052238  | 2.309470  | 1.971068  | C                        | -3.470937 | -0.301149 | 0.003277  |
| C         | -3.800668 | 3.192836  | -0.515466 | H                        | -4.401447 | -0.847883 | 0.003963  |
| H         | -3.698099 | 4.057387  | -1.179182 | N                        | -2.235090 | -0.929425 | 0.001169  |
| H         | -3.727306 | 2.274113  | -1.099647 | C                        | -1.141381 | 2.464353  | 0.002516  |
| H         | -4.774935 | 3.229377  | -0.018452 | H                        | -1.402232 | 3.039597  | 0.896017  |
| O         | 2.269618  | -0.724506 | 2.050241  | H                        | -0.069332 | 2.260908  | 0.001145  |
| O         | 3.835622  | -2.144003 | 1.165431  | H                        | -1.404074 | 3.040664  | -0.889747 |
| C         | 3.083477  | -1.127564 | 3.166474  | C                        | -2.018622 | -2.368703 | -0.000488 |
| C         | 4.209652  | -1.993515 | 2.545546  | H                        | -2.454848 | -2.825652 | -0.894252 |
| B         | 2.734814  | -1.363088 | 0.931467  | H                        | -0.937813 | -2.522762 | -0.001290 |
| C         | 2.126190  | -1.196654 | -0.519021 | H                        | -2.453948 | -2.827522 | 0.892761  |
| O         | 0.717338  | -1.019994 | -0.429152 | O                        | 2.413961  | -1.091343 | -0.004261 |
| H         | 2.354993  | -2.114657 | -1.081785 | Cu                       | 0.605316  | -0.306920 | -0.003374 |
| C         | 2.829947  | -0.030340 | -1.217426 | C                        | 3.162925  | 0.239837  | -0.000094 |
| C         | 4.148606  | -0.164045 | -1.666703 | O                        | 4.364295  | 0.164012  | 0.018542  |
| C         | 2.186048  | 1.199402  | -1.378498 | O                        | 2.279680  | 1.113952  | -0.017624 |
| C         | 4.808174  | 0.906565  | -2.264477 | H                        | 3.014956  | -1.846980 | 0.024493  |
| H         | 4.660334  | -1.113722 | -1.545635 |                          |           |           |           |
| C         | 2.844468  | 2.268660  | -1.982807 | <b>3a'</b>               |           |           |           |
| H         | 1.159589  | 1.296460  | -1.043196 | C                        | -1.249471 | 0.026093  | -0.000397 |
| C         | 4.157748  | 2.129126  | -2.425866 | N                        | -2.346941 | 0.834620  | 0.000704  |
| H         | 5.828702  | 0.784116  | -2.611287 | C                        | -3.519557 | 0.094875  | 0.001270  |
| H         | 2.325997  | 3.212989  | -2.111461 | H                        | -4.495682 | 0.555153  | 0.002196  |
| H         | 4.668181  | 2.961554  | -2.897431 | C                        | -3.151780 | -1.212533 | 0.000356  |
| Cu        | -1.623266 | 0.621610  | -0.525167 | H                        | -3.745515 | -2.113772 | 0.000332  |
| H         | 2.460426  | -1.688523 | 3.871337  | N                        | -1.765914 | -1.235142 | -0.000469 |
| H         | 3.464598  | -0.233714 | 3.670155  | C                        | -2.275530 | 2.290150  | 0.001374  |
| H         | 5.189782  | -1.507065 | 2.593961  | H                        | -2.756363 | 2.698210  | 0.895635  |
| H         | 4.286877  | -2.984194 | 3.003333  | H                        | -1.219766 | 2.565122  | 0.000041  |
| C         | -1.459009 | -1.029443 | -1.554973 | H                        | -2.758892 | 2.699113  | -0.891102 |
| C         | 0.009842  | -1.379655 | -1.653825 | C                        | -0.949872 | -2.445859 | -0.001495 |
| C         | -2.330504 | -2.046790 | -0.900593 | H                        | -1.158643 | -3.041923 | -0.895139 |
| C         | -3.658596 | -2.242486 | -1.328025 | H                        | 0.100019  | -2.147502 | -0.000784 |
| C         | -4.495788 | -3.172003 | -0.722262 | H                        | -1.159283 | -3.043795 | 0.890740  |
| C         | -4.035672 | -3.956034 | 0.336509  | O                        | 2.609799  | -1.221755 | 0.003194  |
| C         | -2.722903 | -3.785424 | 0.772217  | Cu                       | 0.538816  | 0.491232  | -0.001141 |
| C         | -1.887038 | -2.848793 | 0.169709  | C                        | 3.201470  | 0.066528  | 0.000452  |
| H         | -1.829326 | -0.838085 | -2.569038 | O                        | 4.410418  | 0.148839  | 0.000783  |
| H         | 0.464784  | -0.832402 | -2.487490 | O                        | 2.314109  | 0.987481  | -0.002103 |
| H         | 0.188584  | -2.456159 | -1.814555 | H                        | 3.352284  | -1.844712 | 0.005165  |
| H         | -4.032072 | -1.648500 | -2.157922 |                          |           |           |           |
| H         | -5.511787 | -3.294995 | -1.085426 | <b>TS<sub>3b'</sub></b>  |           |           |           |
| H         | -4.685785 | -4.684531 | 0.808291  | C                        | -2.332737 | 0.010211  | 0.073081  |
| H         | -2.344154 | -4.386390 | 1.593730  | N                        | -2.833550 | 1.225687  | -0.293225 |
| H         | -0.877252 | -2.711653 | 0.539159  | C                        | -4.126728 | 1.402349  | 0.172147  |
|           |           |           |           | H                        | -4.693049 | 2.301722  | -0.016243 |
| <b>3'</b> |           |           |           | C                        | -4.455266 | 0.271338  | 0.849639  |
| Cu        | -1.433182 | 0.000047  | -0.011435 | H                        | -5.362242 | -0.005258 | 1.365248  |

|                         |           |           |           |                                |           |           |           |
|-------------------------|-----------|-----------|-----------|--------------------------------|-----------|-----------|-----------|
| N                       | -3.350861 | -0.564153 | 0.778335  | H                              | 3.347175  | -1.126987 | 2.243254  |
| C                       | -2.085165 | 2.197113  | -1.087559 | H                              | 2.251353  | 0.923144  | 1.466781  |
| H                       | -1.988261 | 3.138815  | -0.538108 | H                              | 0.502183  | 3.147405  | 1.607468  |
| H                       | -1.094475 | 1.782563  | -1.286297 |                                |           |           |           |
| H                       | -2.596804 | 2.383571  | -2.036870 | <b>3c'</b>                     |           |           |           |
| C                       | -3.258000 | -1.892538 | 1.364036  | C                              | 2.115086  | -0.274475 | 0.021438  |
| H                       | -4.021463 | -2.555607 | 0.944884  | N                              | 3.074872  | 0.503088  | -0.553998 |
| H                       | -2.266463 | -2.275914 | 1.115515  | C                              | 4.219283  | -0.227335 | -0.835201 |
| H                       | -3.373490 | -1.846770 | 2.451816  | H                              | 5.091358  | 0.213130  | -1.294016 |
| O                       | 0.991743  | -1.771482 | -0.427858 | C                              | 3.976037  | -1.500363 | -0.428170 |
| Cu                      | -0.656458 | -0.627075 | -0.352446 | H                              | 4.593825  | -2.384652 | -0.464601 |
| C                       | 1.753060  | -0.615052 | -1.313191 | N                              | 2.690158  | -1.508331 | 0.090709  |
| O                       | 0.801699  | 0.181720  | -1.663751 | C                              | 2.897009  | 1.924374  | -0.833865 |
| H                       | 2.216646  | -1.236414 | -2.102336 | H                              | 3.062031  | 2.121881  | -1.897569 |
| C                       | 2.819324  | -0.085554 | -0.362388 | H                              | 1.872686  | 2.196342  | -0.569825 |
| C                       | 4.140542  | -0.528249 | -0.419206 | H                              | 3.599983  | 2.520225  | -0.242511 |
| C                       | 2.468009  | 0.878388  | 0.585914  | C                              | 2.009009  | -2.677779 | 0.630341  |
| C                       | 5.097893  | -0.022492 | 0.461120  | H                              | 2.554754  | -3.079333 | 1.490016  |
| H                       | 4.422551  | -1.268141 | -1.163061 | H                              | 1.015182  | -2.355976 | 0.945768  |
| C                       | 3.415793  | 1.382910  | 1.468297  | H                              | 1.912385  | -3.454067 | -0.134960 |
| H                       | 1.442085  | 1.229488  | 0.591343  | O                              | -0.659887 | 2.746577  | -0.148913 |
| C                       | 4.736596  | 0.932243  | 1.408593  | Cu                             | 0.391232  | 0.257734  | 0.572661  |
| H                       | 6.124635  | -0.368236 | 0.403307  | C                              | -1.391480 | 0.807961  | 1.142571  |
| H                       | 3.132771  | 2.133045  | 2.199589  | C                              | -1.444402 | 2.313548  | 1.004686  |
| H                       | 5.479232  | 1.329514  | 2.092087  | C                              | -2.387327 | 0.047984  | 0.336728  |
| H                       | 1.519032  | -2.053854 | 0.334280  | C                              | -2.955401 | -1.145423 | 0.824206  |
|                         |           |           |           | C                              | -3.873730 | -1.878729 | 0.081415  |
| <b>3b'</b>              |           |           |           | C                              | -4.273279 | -1.441735 | -1.182041 |
| C                       | -2.290890 | 0.057026  | -0.030953 | C                              | -3.730753 | -0.258981 | -1.682006 |
| N                       | -3.423019 | -0.196592 | -0.749618 | C                              | -2.804534 | 0.470287  | -0.941535 |
| C                       | -4.394687 | 0.766216  | -0.521610 | H                              | -1.509368 | 0.550847  | 2.201666  |
| H                       | -5.362631 | 0.738194  | -0.998179 | H                              | -1.027104 | 2.777093  | 1.907713  |
| C                       | -3.863305 | 1.649865  | 0.362336  | H                              | -2.472415 | 2.688946  | 0.870028  |
| H                       | -4.278417 | 2.542377  | 0.805022  | H                              | -2.666355 | -1.495289 | 1.811755  |
| N                       | -2.583564 | 1.202705  | 0.650250  | H                              | -4.291390 | -2.791535 | 0.495805  |
| C                       | -3.572557 | -1.341214 | -1.637292 | H                              | -4.992558 | -2.009643 | -1.761736 |
| H                       | -3.746410 | -1.011086 | -2.666311 | H                              | -4.028214 | 0.099245  | -2.663136 |
| H                       | -2.644279 | -1.912782 | -1.591968 | H                              | -2.368670 | 1.371113  | -1.358148 |
| H                       | -4.404762 | -1.973787 | -1.312909 | H                              | -0.901072 | 3.665470  | -0.340520 |
| C                       | -1.649971 | 1.862997  | 1.557834  | <b>TS1-CO<sub>2</sub>-ins</b>  |           |           |           |
| H                       | -2.087235 | 1.940726  | 2.558037  | C                              | -2.797501 | -0.209054 | 0.265761  |
| H                       | -0.740456 | 1.260404  | 1.606651  | N                              | -4.040609 | 0.353170  | 0.235679  |
| H                       | -1.407076 | 2.864689  | 1.189171  | C                              | -4.939287 | -0.363558 | 1.008753  |
| O                       | 1.173891  | -0.510120 | 1.944942  | H                              | -5.975042 | -0.077314 | 1.109587  |
| Cu                      | -0.700039 | -0.876410 | 0.036683  | C                              | -4.248994 | -1.406626 | 1.539276  |
| C                       | 1.819865  | -1.286389 | 0.861428  | H                              | -4.566734 | -2.204933 | 2.192444  |
| O                       | 0.863396  | -1.819369 | 0.091609  | N                              | -2.947622 | -1.296716 | 1.075101  |
| H                       | 2.430715  | -2.068117 | 1.353511  | C                              | -4.361957 | 1.555573  | -0.526756 |
| C                       | 2.769501  | -0.334556 | 0.121770  | H                              | -4.647342 | 2.370510  | 0.145751  |
| C                       | 4.146121  | -0.371578 | 0.337921  | H                              | -3.471978 | 1.842144  | -1.089130 |
| C                       | 2.257324  | 0.604333  | -0.778286 | H                              | -5.182029 | 1.354028  | -1.222269 |
| C                       | 4.999430  | 0.515677  | -0.321280 | C                              | -1.862920 | -2.213069 | 1.403631  |
| H                       | 4.557233  | -1.108787 | 1.022583  | H                              | -2.144315 | -3.238819 | 1.145409  |
| C                       | 3.099203  | 1.492584  | -1.435322 | H                              | -0.987363 | -1.920080 | 0.821657  |
| H                       | 1.188348  | 0.607359  | -0.964248 | H                              | -1.626617 | -2.161282 | 2.471472  |
| C                       | 4.477224  | 1.452988  | -1.207422 | O                              | 1.221284  | -2.143699 | -0.409542 |
| H                       | 6.069451  | 0.469582  | -0.147240 | O                              | 3.375062  | -1.828851 | -1.125991 |
| H                       | 2.686870  | 2.214529  | -2.133007 | C                              | 1.777535  | -3.466953 | -0.521287 |
| H                       | 5.135904  | 2.142401  | -1.724517 | C                              | 3.266519  | -3.241629 | -0.888778 |
| H                       | 1.868089  | -0.104397 | 2.488013  | B                              | 2.184004  | -1.242661 | -0.799024 |
|                         |           |           |           | C                              | 1.971319  | 0.320681  | -0.815664 |
|                         |           |           |           | O                              | 0.617173  | 0.617582  | -1.170585 |
| <b>TS<sub>sc</sub>'</b> |           |           |           | H                              | 2.605786  | 0.781222  | -1.579249 |
| C                       | -1.737069 | -0.312816 | 0.145094  | C                              | 2.350379  | 0.894831  | 0.543071  |
| N                       | -3.048806 | -0.143980 | -0.207342 | C                              | 3.662718  | 1.302816  | 0.799011  |
| C                       | -3.707972 | -1.358049 | -0.315740 | C                              | 1.410345  | 0.970351  | 1.575122  |
| H                       | -4.750304 | -1.431456 | -0.585986 | C                              | 4.026440  | 1.779794  | 2.056008  |
| C                       | -2.794050 | -2.317847 | -0.021923 | H                              | 4.399832  | 1.254662  | 0.004219  |
| H                       | -2.884489 | -3.392726 | 0.014449  | C                              | 1.770335  | 1.453612  | 2.829959  |
| N                       | -1.603311 | -1.665072 | 0.255619  | H                              | 0.390100  | 0.661419  | 1.376916  |
| C                       | -3.658800 | 1.156924  | -0.442757 | C                              | 3.080934  | 1.858012  | 3.076813  |
| H                       | -4.532737 | 1.292664  | 0.202208  | H                              | 5.046542  | 2.102115  | 2.234555  |
| H                       | -2.910622 | 1.915547  | -0.206777 | H                              | 1.025488  | 1.515785  | 3.616306  |
| H                       | -3.960944 | 1.260783  | -1.489910 | H                              | 3.361448  | 2.236557  | 4.053450  |
| C                       | -0.365610 | -2.347398 | 0.620562  | Cu                             | -1.300520 | 0.409644  | -0.622326 |
| H                       | -0.023133 | -2.981153 | -0.201318 | H                              | 1.230530  | -4.013836 | -1.296960 |
| H                       | 0.399731  | -1.598705 | 0.822217  | H                              | 1.650458  | -3.989100 | 0.432290  |
| H                       | -0.526908 | -2.959682 | 1.513492  | H                              | 3.946458  | -3.515761 | -0.074987 |
| O                       | 0.286535  | 2.785376  | 0.732282  | H                              | 3.567417  | -3.779075 | -1.792915 |
| Cu                      | -0.493288 | 1.062778  | 0.300455  | O                              | -0.917472 | 1.835727  | -2.176487 |
| C                       | 1.544839  | 1.556829  | -1.093770 | C                              | 0.323469  | 1.741258  | -2.169019 |
| C                       | 1.619088  | 2.769405  | -0.373868 | O                              | 1.268208  | 2.252237  | -2.709501 |
| C                       | 2.124773  | 0.330966  | -0.612814 | <b>Int1-CO<sub>2</sub>-ins</b> |           |           |           |
| C                       | 2.377865  | -0.765748 | -1.477420 | C                              | 2.956295  | 0.247662  | 0.334914  |
| C                       | 2.967290  | -1.936440 | -1.024837 | N                              | 4.279032  | -0.036360 | 0.507383  |
| C                       | 3.336141  | -2.087020 | 0.317007  | C                              | 4.708076  | 0.311765  | 1.778510  |
| C                       | 3.079871  | -1.032710 | 1.194513  | H                              | 5.725499  | 0.165981  | 2.107652  |
| C                       | 2.468504  | 0.136043  | 0.753482  | C                              | 3.629088  | 0.828615  | 2.422001  |
| H                       | 1.204563  | 1.587661  | -2.122814 | H                              | 3.523603  | 1.220560  | 3.421993  |
| H                       | 1.408512  | 3.677141  | -0.929757 | N                              | 2.572337  | 0.782634  | 1.527567  |
| H                       | 2.429700  | 2.896374  | 0.345355  | C                              | 5.119127  | -0.630438 | -0.524364 |
| H                       | 2.123982  | -0.664944 | -2.528552 | H                              | 5.486699  | -1.610651 | -0.205386 |
| H                       | 3.159619  | -2.740776 | -1.729215 | H                              | 4.505684  | -0.747363 | -1.418938 |
| H                       | 3.810964  | -2.997321 | 0.664537  |                                |           |           |           |

|                                |           |           |           |                               |           |           |           |
|--------------------------------|-----------|-----------|-----------|-------------------------------|-----------|-----------|-----------|
| H                              | 5.968450  | 0.021807  | -0.749104 | O                             | -1.066956 | 1.756293  | -1.353122 |
| C                              | 1.215767  | 1.244681  | 1.813133  | C                             | -0.811398 | 2.393539  | 0.882512  |
| H                              | 1.232328  | 2.297936  | 2.107841  | C                             | -1.014695 | 2.926015  | -0.548125 |
| H                              | 0.614058  | 1.134762  | 0.911461  | B                             | -1.337545 | 0.642347  | -0.497424 |
| H                              | 0.772389  | 0.646715  | 2.614834  | C                             | -2.464748 | -0.441654 | -0.969992 |
| O                              | -1.783463 | 2.175087  | 0.438772  | O                             | -1.834005 | -1.767432 | -0.831682 |
| O                              | -3.910846 | 1.609570  | -0.197220 | H                             | -2.654103 | -0.317610 | -2.040961 |
| C                              | -2.610408 | 3.268818  | 0.875574  | C                             | -3.770018 | -0.413589 | -0.228418 |
| C                              | -4.060447 | 2.817977  | 0.566100  | C                             | -4.749441 | 0.508749  | -0.614987 |
| B                              | -2.584374 | 1.266730  | -0.205245 | C                             | -4.031357 | -1.248318 | 0.860878  |
| C                              | -2.067995 | -0.075212 | -0.856860 | C                             | -5.953146 | 0.604636  | 0.076909  |
| O                              | -0.695534 | 0.065201  | -1.245729 | H                             | -4.564161 | 1.156919  | -1.466173 |
| H                              | -2.649182 | -0.287135 | -1.760862 | C                             | -5.239887 | -1.159126 | 1.547900  |
| C                              | -2.236120 | -1.240304 | 0.114448  | H                             | -3.288050 | -1.976359 | 1.159757  |
| C                              | -3.514557 | -1.624282 | 0.537960  | C                             | -6.205226 | -0.231598 | -1.163056 |
| C                              | -1.128925 | -1.934508 | 0.607947  | H                             | -6.699144 | 1.326495  | -0.238521 |
| C                              | -3.679822 | -2.681472 | 1.427831  | H                             | -5.427562 | -1.819522 | 2.388022  |
| H                              | -4.381860 | -1.090267 | 0.164325  | H                             | -7.145407 | -0.164187 | 1.699331  |
| C                              | -1.295782 | -2.993879 | 1.498605  | Cu                            | 1.713333  | -0.148788 | -0.229629 |
| H                              | -0.141635 | -1.640020 | 0.273773  | H                             | 0.266264  | 2.332772  | 1.128440  |
| C                              | -2.569907 | -3.372266 | 1.913272  | H                             | -1.296827 | 3.005868  | 1.651330  |
| H                              | -4.678070 | -2.971017 | 1.738380  | H                             | -1.957562 | 3.487472  | -0.632132 |
| H                              | -0.425093 | -3.528741 | 1.863387  | H                             | -0.199455 | 3.581643  | -0.882676 |
| H                              | -2.699068 | -4.199446 | 2.602461  | O                             | -0.087766 | -0.415863 | -0.638404 |
| Cu                             | 1.895794  | -0.042306 | -1.153730 | C                             | -0.514813 | -1.689993 | -0.678477 |
| H                              | -2.322466 | 4.169506  | 0.322513  | O                             | 0.218536  | -2.646073 | -0.590446 |
| H                              | -2.438307 | 3.442801  | 1.942423  | <b>1b<sub>3</sub></b>         |           |           |           |
| H                              | -4.633481 | 2.594351  | 1.472622  | C                             | -3.285627 | -0.009170 | -0.089268 |
| H                              | -4.616515 | 3.548844  | -0.028400 | N                             | -4.329511 | -0.180203 | -0.948797 |
| O                              | 0.918350  | -0.347067 | -2.700455 | C                             | -5.373275 | 0.679272  | -0.648098 |
| C                              | -0.352854 | -0.327466 | -2.578771 | H                             | -6.293467 | 0.694917  | -1.211335 |
| O                              | -1.219502 | -0.569975 | -3.385746 | C                             | -4.972431 | 1.406322  | 0.427874  |
| <b>TS2-CO<sub>2</sub>-cyc</b>  |           |           |           | H                             | -5.473983 | 2.185627  | 0.980429  |
| C                              | 3.751444  | -0.098563 | -0.027554 | N                             | -3.701826 | 0.970028  | 0.756573  |
| N                              | 4.666178  | 0.908312  | -0.093745 | C                             | -4.334416 | -1.138638 | -2.045223 |
| C                              | 5.948762  | 0.439008  | 0.146745  | H                             | -4.424702 | -0.622467 | -3.005809 |
| H                              | 6.813788  | 1.084194  | 0.137715  | H                             | -3.387143 | -2.167879 | -2.014565 |
| C                              | 5.835432  | -0.896386 | 0.369141  | H                             | -5.161457 | -1.846550 | -1.933236 |
| H                              | 6.583724  | -1.641293 | 0.592527  | C                             | -2.875789 | 1.537681  | 1.828074  |
| N                              | 4.489660  | -1.206334 | 0.258535  | H                             | -3.528211 | 2.069258  | 2.523835  |
| C                              | 4.321786  | 2.292392  | -0.388236 | H                             | -2.367642 | 0.728055  | 2.353838  |
| H                              | 4.819356  | 2.626502  | -1.303786 | H                             | -2.120482 | 2.209744  | 1.410892  |
| H                              | 3.240552  | 2.335954  | -0.527973 | O                             | 1.875857  | -1.258909 | 1.349289  |
| H                              | 4.608873  | 2.945726  | 0.441444  | O                             | 0.110697  | -1.609801 | -0.151337 |
| C                              | 3.921873  | -2.544969 | 0.424376  | C                             | 1.144849  | -2.382944 | 1.790377  |
| H                              | 4.112455  | -2.910159 | 1.437899  | C                             | 0.385632  | -2.841961 | 0.540813  |
| H                              | 2.844042  | -2.492385 | 0.254876  | B                             | 1.129223  | -0.565757 | 0.356136  |
| H                              | 4.369024  | -3.232329 | -0.299696 | C                             | 1.956217  | 0.211092  | -0.817717 |
| O                              | -1.644431 | 1.098631  | 1.289411  | O                             | 1.309721  | 1.521154  | -0.871351 |
| O                              | -1.603032 | 2.155241  | -0.755754 | H                             | 1.773405  | -0.249278 | -1.794352 |
| C                              | -1.158065 | 2.416698  | 1.547416  | C                             | 3.444057  | 0.363520  | -0.619918 |
| C                              | -1.377236 | 3.179863  | 0.218814  | C                             | 4.270126  | -0.758640 | -0.758279 |
| B                              | -1.737786 | 0.954542  | -0.081707 | C                             | 4.032357  | 1.588559  | -0.299133 |
| C                              | -2.417523 | -0.311857 | -0.770675 | C                             | 5.645143  | -0.659945 | -0.577493 |
| O                              | -1.689479 | -1.524848 | -0.450230 | H                             | 3.829631  | -1.719054 | -1.005546 |
| H                              | -2.368334 | -0.177203 | -1.857636 | C                             | 5.411272  | 1.687600  | -0.114996 |
| C                              | -3.864263 | -0.479499 | -0.367712 | H                             | 3.407404  | 2.467550  | -0.206424 |
| C                              | -4.828394 | 0.371565  | -0.921060 | C                             | 6.224192  | 0.566680  | -0.252493 |
| C                              | -4.268378 | -1.437038 | 0.565404  | H                             | 6.267301  | -1.541807 | -0.688932 |
| C                              | -6.164960 | 0.272361  | -0.546177 | H                             | 5.849235  | 2.648721  | 0.133041  |
| H                              | -4.526366 | 1.116849  | -1.650649 | H                             | 7.296472  | 0.645335  | -0.110693 |
| C                              | -5.607965 | -1.538847 | 0.936061  | Cu                            | -1.605393 | -0.801036 | -0.119975 |
| H                              | -3.528569 | -2.104821 | 0.986790  | H                             | 0.440580  | -2.112708 | 2.594837  |
| C                              | -6.561453 | -0.685876 | 0.385443  | H                             | 1.829743  | -3.147380 | 2.174077  |
| H                              | -6.898498 | 0.939038  | -0.987106 | H                             | 1.015904  | -3.471014 | -0.100648 |
| H                              | -5.906835 | -2.291471 | 1.658059  | H                             | -0.547679 | -3.373276 | 0.752484  |
| H                              | -7.603293 | -0.769030 | 0.674843  | O                             | 0.263814  | 0.572520  | 0.861638  |
| Cu                             | 1.917807  | -0.076998 | -0.263605 | C                             | 0.387031  | 1.663500  | 0.104863  |
| H                              | -0.094348 | 2.366561  | 1.819007  | O                             | -0.264000 | 2.670736  | 0.233756  |
| H                              | -1.709570 | 2.850591  | 2.387840  | <b>TS1-CO<sub>2</sub>-add</b> |           |           |           |
| H                              | -2.255749 | 3.836154  | 0.257302  | C                             | -2.630310 | -0.225585 | 0.252422  |
| H                              | -0.509345 | 3.781560  | -0.073977 | N                             | -3.233729 | 0.823369  | 0.878420  |
| O                              | 0.070338  | -0.152502 | -0.490316 | C                             | -4.515180 | 0.493557  | 1.291253  |
| C                              | -0.347316 | -1.384380 | -0.347701 | H                             | -5.155000 | 1.192244  | 1.808112  |
| O                              | 0.352639  | -2.362131 | -0.142315 | C                             | -4.722688 | -0.795133 | 0.915312  |
| <b>Int2-CO<sub>2</sub>-cyc</b> |           |           |           | H                             | -5.580038 | -1.438711 | 1.039810  |
| C                              | 3.523808  | -0.035990 | 0.152557  | N                             | -3.563761 | -1.217349 | 0.284978  |
| N                              | 4.324974  | 1.051312  | 0.316713  | C                             | -2.596259 | 2.115772  | 1.096817  |
| C                              | 5.631402  | 0.674657  | 0.587998  | H                             | -2.497626 | 2.317214  | 2.167974  |
| H                              | 6.419890  | 1.393368  | 0.750113  | H                             | -1.606081 | 2.083159  | 0.642039  |
| C                              | 5.649399  | -0.683731 | 0.592609  | H                             | -3.181715 | 2.913676  | 0.629798  |
| H                              | 6.457561  | -1.379119 | 0.759760  | C                             | -3.359252 | -2.553828 | -0.273210 |
| N                              | 4.355367  | -1.099575 | 0.324505  | H                             | -4.066107 | -2.732443 | -1.089317 |
| C                              | 3.854925  | 2.427321  | 0.216191  | H                             | -2.338656 | -2.622832 | -0.654571 |
| H                              | 4.387510  | 2.956660  | -0.579437 | H                             | -3.506823 | -3.308132 | 0.505335  |
| H                              | 2.790575  | 2.395795  | -0.020785 | O                             | 2.039114  | -1.062077 | 1.394156  |
| H                              | 3.999749  | 2.952692  | 1.164925  | O                             | 4.057938  | -0.597945 | 0.405175  |
| C                              | 3.925188  | -2.494812 | 0.236092  | C                             | 3.020970  | -1.691084 | 2.232531  |
| H                              | 4.082771  | -2.999427 | 1.193747  | C                             | 4.385580  | -1.247320 | 1.644100  |
| H                              | 2.862164  | -2.515976 | -0.011806 | B                             | 2.693964  | -0.569305 | 0.293070  |
| H                              | 4.488525  | -3.012408 | -0.545613 | C                             | 1.932175  | 0.120877  | -0.912709 |
| O                              | -1.387808 | 1.100482  | 0.853693  |                               |           |           |           |

|                        |           |           |           |                                              |           |           |           |
|------------------------|-----------|-----------|-----------|----------------------------------------------|-----------|-----------|-----------|
| O                      | 0.758779  | -0.649666 | -1.249052 | C                                            | 2.579709  | 3.633697  | 1.978116  |
| H                      | 2.591413  | 0.107113  | -1.789792 | H                                            | 0.873081  | 4.043364  | 0.735247  |
| C                      | 1.498821  | 1.558664  | -0.677206 | C                                            | 2.749598  | 1.391539  | 2.823782  |
| C                      | 2.072280  | 2.351661  | 0.320313  | H                                            | 1.145459  | 0.065427  | 2.269433  |
| C                      | 0.533263  | 2.137795  | -1.514527 | C                                            | 3.265520  | 2.680212  | 2.732025  |
| C                      | 1.689644  | 3.682659  | 0.486544  | H                                            | 2.963991  | 4.646116  | 1.906366  |
| H                      | 2.834286  | 1.932183  | 0.967539  | H                                            | 3.259959  | 0.643189  | 3.422050  |
| C                      | 0.153288  | 3.467181  | -1.352804 | H                                            | 4.182083  | 2.944141  | 3.248499  |
| H                      | 0.113103  | 1.545264  | -2.317728 | Cu                                           | 0.522000  | -0.923317 | 0.200290  |
| C                      | 0.726439  | 4.245039  | -0.346545 | H                                            | -0.500188 | 1.912065  | -3.670572 |
| H                      | 2.148612  | 4.279720  | 1.267102  | H                                            | 1.251410  | 2.213176  | -3.519081 |
| H                      | -0.583078 | 3.901274  | -2.021067 | H                                            | 0.878869  | 4.315197  | -2.399739 |
| H                      | 0.433238  | 5.281660  | -0.221973 | H                                            | -0.748881 | 4.223702  | -3.115071 |
| Cu                     | -0.930356 | -0.361553 | -0.478321 | O                                            | -2.234553 | 1.420175  | -1.135792 |
| H                      | 2.882773  | -2.776254 | 2.181055  | C                                            | -2.217056 | 0.209502  | -0.855431 |
| H                      | 2.873147  | -1.362877 | 3.266534  | H                                            | -1.497984 | -0.457196 | -1.350276 |
| H                      | 4.912601  | -0.534394 | 2.289129  | C                                            | -3.333625 | -0.463276 | -0.159551 |
| H                      | 5.050183  | -2.091573 | 1.438551  | C                                            | -3.314095 | -1.851012 | 0.002258  |
| C                      | 0.965329  | -2.265087 | -1.319769 | C                                            | -4.420159 | 0.273142  | 0.322090  |
| O                      | -0.132951 | -2.756445 | -1.465769 | C                                            | -4.366011 | -2.500134 | 0.640409  |
| O                      | 2.132631  | -2.554852 | -1.197194 | H                                            | -2.464929 | -2.414633 | -0.371970 |
| <b>1b<sub>3</sub>'</b> |           |           |           | C                                            | -5.471479 | -0.374475 | 0.959943  |
| C                      | -2.965551 | -0.300228 | -0.019464 | H                                            | -4.417540 | 1.347328  | 0.182787  |
| N                      | -3.719891 | 0.829959  | 0.044535  | C                                            | -5.446709 | -1.761037 | 1.120546  |
| C                      | -5.043865 | 0.532048  | 0.326215  | H                                            | -4.347070 | -3.577355 | 0.764559  |
| H                      | -5.801571 | 1.294871  | 0.418802  | H                                            | -6.313417 | 0.197939  | 1.333380  |
| C                      | -5.121274 | -0.819437 | 0.442682  | H                                            | -6.268699 | -2.263986 | 1.618141  |
| H                      | -5.959963 | -1.463594 | 0.657904  | <b>1b<sub>4</sub></b>                        |           |           |           |
| N                      | -3.843930 | -1.310300 | 0.228272  | C                                            | -2.724609 | -0.858910 | 0.933523  |
| C                      | -3.193577 | 2.174585  | -0.164387 | N                                            | -3.187630 | -0.084503 | 1.950856  |
| H                      | -3.410037 | 2.804121  | 0.703329  | C                                            | -4.535619 | -0.306521 | 2.173411  |
| H                      | -2.113077 | 2.100635  | -0.288676 | H                                            | -5.086489 | 0.214876  | 2.940928  |
| H                      | -3.635373 | 2.623004  | -1.059460 | C                                            | -4.934522 | -1.239699 | 1.270116  |
| C                      | -3.474099 | -2.724966 | 0.266339  | H                                            | -5.900886 | -1.685023 | 1.090525  |
| H                      | -4.024672 | -3.278181 | -0.500175 | N                                            | -3.814078 | -1.565444 | 0.522601  |
| H                      | -2.402467 | -2.810001 | 0.076339  | C                                            | -2.352538 | 0.834068  | 2.729522  |
| H                      | -3.698647 | -3.145446 | 1.250758  | H                                            | -1.942847 | 0.322066  | 3.605914  |
| O                      | 3.282851  | -0.256841 | 1.191597  | H                                            | -1.537948 | 1.210594  | 2.102483  |
| O                      | 4.239765  | -0.790011 | -0.857250 | H                                            | -2.969189 | 1.673859  | 3.059455  |
| C                      | 4.650601  | -0.549376 | 1.445877  | C                                            | -3.803697 | -2.513652 | -0.583041 |
| C                      | 5.307065  | -0.537337 | 0.047737  | H                                            | -4.481702 | -2.183729 | -1.375721 |
| B                      | 3.017539  | -0.705841 | -0.136659 | H                                            | -2.788193 | -2.553191 | -0.977803 |
| C                      | 1.765412  | 0.025721  | -0.911437 | H                                            | -4.101492 | -3.508271 | -0.237103 |
| O                      | 0.649431  | -0.928364 | 0.740646  | O                                            | -0.049196 | 2.201880  | 0.794876  |
| H                      | 1.968177  | 0.065351  | -1.984551 | O                                            | 2.200432  | 2.508667  | 0.239261  |
| C                      | 1.294967  | 1.363141  | -0.423035 | C                                            | 0.371375  | 3.428250  | 1.372576  |
| C                      | 0.809525  | 1.513122  | 0.885815  | C                                            | 1.676808  | 3.761772  | 0.626858  |
| C                      | 1.338181  | 2.489742  | -1.249304 | B                                            | 1.170969  | 1.490448  | 0.391924  |
| C                      | 0.380125  | 2.753848  | 1.345254  | C                                            | 1.014368  | 0.476289  | -0.908762 |
| H                      | 0.840577  | 0.665879  | 1.558727  | O                                            | 0.874477  | -0.868291 | -0.262035 |
| C                      | 0.914390  | 3.736174  | -0.787866 | H                                            | 1.964831  | 0.444866  | -1.453952 |
| H                      | 1.711025  | 2.388725  | -2.263368 | C                                            | -0.110796 | 0.607004  | -1.904560 |
| C                      | 0.429015  | 3.871641  | 0.510126  | C                                            | -0.673279 | 1.853326  | -2.202386 |
| H                      | 0.029217  | 2.856178  | 2.366780  | C                                            | -0.577112 | -0.517015 | -2.607208 |
| H                      | 0.964458  | 4.598958  | -1.443307 | C                                            | -1.673912 | 1.971063  | -3.164661 |
| H                      | 0.105682  | 4.840662  | 0.874503  | H                                            | -0.340205 | 2.722682  | -1.653455 |
| Cu                     | -1.151604 | -0.511164 | -0.356777 | C                                            | -1.582750 | -0.399293 | -3.564276 |
| H                      | 4.748960  | -1.537811 | 1.920404  | H                                            | -0.112530 | -1.479070 | -2.425173 |
| H                      | 5.069924  | 0.202571  | 2.125262  | C                                            | -2.137538 | 0.847522  | -3.846293 |
| H                      | 5.759729  | 0.440837  | -0.176374 | H                                            | -2.096917 | 2.946695  | -3.379467 |
| H                      | 6.084465  | -1.304914 | -0.056918 | H                                            | -1.918485 | -1.278721 | -4.104466 |
| C                      | 1.090052  | -2.197363 | -0.225563 | H                                            | -2.915479 | 0.944071  | -4.595858 |
| O                      | 0.225463  | -3.023151 | -0.048509 | Cu                                           | -0.986574 | -0.855650 | 0.261749  |
| O                      | 2.344158  | -2.203432 | -0.044410 | H                                            | 0.560281  | 3.306756  | 2.452205  |
| <b>TS1-PhCHO-add</b>   |           |           |           | H                                            | -0.407531 | 4.191460  | 1.243488  |
| C                      | 1.736092  | -2.209021 | -0.373168 | H                                            | 1.473671  | 4.387296  | -0.260087 |
| N                      | 2.533428  | -2.158581 | -1.477142 | H                                            | 2.393619  | 4.303569  | 1.259014  |
| C                      | 3.335744  | -3.283791 | -1.572984 | O                                            | 1.546795  | 0.465901  | 1.467271  |
| H                      | 4.037374  | -3.426286 | -2.380534 | C                                            | 1.736942  | -0.774070 | 0.957355  |
| C                      | 3.037733  | -4.067399 | -0.504728 | H                                            | 1.340931  | -1.552057 | 1.624240  |
| H                      | 3.427580  | -5.026357 | -0.199486 | C                                            | 3.166214  | -1.126774 | 0.569617  |
| N                      | 2.060764  | -3.397138 | 0.214556  | C                                            | 3.479718  | -2.438735 | 0.203271  |
| C                      | 2.550874  | -1.048369 | -2.426564 | C                                            | 4.173872  | -0.162252 | 0.595697  |
| H                      | 2.340386  | -1.417900 | -3.435042 | C                                            | 4.782221  | -2.784444 | -0.142627 |
| H                      | 1.786760  | -0.325156 | -2.134512 | H                                            | 2.697179  | -3.191414 | 0.185541  |
| H                      | 3.531009  | -0.561539 | -2.415974 | C                                            | 5.478688  | -0.508769 | 0.246403  |
| C                      | 1.463649  | -3.885333 | 1.450747  | H                                            | 3.917787  | 0.853689  | 0.870781  |
| H                      | 2.227517  | -4.000194 | 2.225998  | C                                            | 5.786622  | -1.816468 | -0.121047 |
| H                      | 0.726330  | -3.150753 | 1.777368  | H                                            | 5.016343  | -3.805025 | -0.426057 |
| H                      | 0.968316  | -4.846820 | 1.283713  | H                                            | 6.256630  | 0.246913  | 0.262219  |
| O                      | 0.325847  | 1.467520  | -1.820809 | H                                            | 6.803571  | -2.083062 | -0.388084 |
| O                      | -0.576111 | 3.496502  | -1.179986 | <b>TS1-B<sub>2</sub>cg<sub>2</sub>-coord</b> |           |           |           |
| C                      | 0.288552  | 2.277443  | -2.999417 | Cu                                           | -1.194546 | -0.230504 | 0.053655  |
| C                      | -0.026160 | 3.697897  | -2.481092 | B                                            | 1.233521  | -2.218718 | 0.330003  |
| B                      | -0.434351 | 2.151075  | -0.845141 | O                                            | 1.594998  | -3.186092 | 1.240097  |
| C                      | -0.430841 | 1.650875  | 0.685413  | O                                            | 0.621132  | -2.748320 | -0.786857 |
| O                      | -0.761608 | 0.276395  | 0.765333  | C                                            | -3.011850 | -0.598607 | 0.110131  |
| H                      | -1.210370 | 2.218619  | 1.217224  | N                                            | -4.009620 | 0.204823  | 0.575923  |
| C                      | 0.881204  | 1.996912  | 1.387790  | N                                            | -3.669326 | -1.697271 | -0.364543 |
| C                      | 1.402300  | 3.297785  | 1.317687  | C                                            | -5.253787 | -0.376738 | 0.394414  |
| C                      | 1.570956  | 1.055513  | 2.157618  | C                                            | -5.040499 | -1.580175 | -0.197561 |
|                        |           |           |           | C                                            | 1.217161  | -4.469652 | 0.724529  |

|                                               |           |           |           |                         |           |           |           |
|-----------------------------------------------|-----------|-----------|-----------|-------------------------|-----------|-----------|-----------|
| C                                             | 0.707330  | -4.179764 | -0.708242 | C                       | -1.796609 | 0.596047  | 0.434881  |
| C                                             | -3.001362 | -2.838630 | -0.974132 | H                       | -1.860579 | 0.404609  | 1.511841  |
| C                                             | -3.795463 | 1.534643  | 1.142093  | C                       | -3.178733 | 0.455131  | -0.173031 |
| O                                             | 0.598359  | 0.165378  | -0.042159 | C                       | -4.262810 | 1.094924  | 0.439205  |
| H                                             | -6.168203 | 0.108808  | 0.699351  | C                       | -3.398047 | -0.263489 | -1.348933 |
| H                                             | -5.730873 | -2.350562 | -0.505325 | C                       | -5.538274 | 1.026442  | -0.115255 |
| H                                             | 0.440516  | -4.896989 | 1.369950  | H                       | -4.108898 | 1.643697  | 1.364689  |
| H                                             | 2.085698  | -5.135312 | 0.738670  | C                       | -4.675035 | -0.336112 | -1.901108 |
| H                                             | -0.278334 | -4.614599 | -0.906383 | H                       | -2.566377 | -0.784501 | -1.802542 |
| H                                             | 1.402246  | -4.531919 | -1.478841 | C                       | -5.748856 | 0.310151  | -1.292092 |
| H                                             | -3.371785 | -2.997084 | -1.992043 | H                       | -6.367911 | 1.524456  | 0.375574  |
| H                                             | -1.932475 | -2.620752 | -1.007896 | H                       | -4.832399 | -0.907991 | -2.809555 |
| H                                             | -3.174496 | -3.744774 | -0.383564 | H                       | -6.741838 | 0.248966  | -1.724054 |
| H                                             | -2.732827 | 1.665981  | 1.347864  | <b>TS2-metathesis</b>   |           |           |           |
| H                                             | -4.113333 | 2.304338  | 0.432692  | Cu                      | -1.114284 | 0.179432  | 0.196693  |
| H                                             | -4.366887 | 1.632607  | 2.070019  | B                       | -1.716961 | -1.869600 | -0.318096 |
| B                                             | 0.375669  | 2.477537  | 0.822519  | C                       | -2.189196 | 1.600972  | 0.782119  |
| O                                             | -0.538679 | 2.283033  | 1.855909  | N                       | -3.437395 | 2.001126  | 0.408204  |
| O                                             | 1.631070  | 2.768839  | 1.302139  | N                       | -1.844464 | 2.478497  | 1.768359  |
| C                                             | 0.192795  | 2.216411  | 3.091522  | C                       | -3.860901 | 3.095845  | 1.147030  |
| C                                             | 1.608241  | 2.721998  | 2.733724  | C                       | -2.854690 | 3.395537  | 2.008448  |
| H                                             | 2.396335  | 2.053012  | 3.086283  | C                       | -0.564083 | 2.436378  | 2.466778  |
| H                                             | 1.801465  | 3.726620  | 3.123804  | C                       | -4.219915 | 1.368152  | -0.646205 |
| H                                             | 0.201878  | 1.180244  | 3.444249  | C                       | -3.709618 | -3.015334 | -0.164973 |
| H                                             | -0.306790 | 2.837567  | 3.839239  | O                       | -2.464525 | -2.718941 | 0.481636  |
| B                                             | -0.084079 | 2.561179  | -0.794689 | C                       | -3.551369 | -2.454215 | -1.590528 |
| O                                             | -1.373728 | 2.269875  | -1.215590 | O                       | -2.398961 | -1.597491 | -1.511036 |
| O                                             | 0.727601  | 2.917584  | -1.845857 | H                       | -4.822655 | 3.560984  | 0.993626  |
| C                                             | -1.440124 | 2.429744  | -2.643449 | H                       | -2.770696 | 4.169859  | 2.755596  |
| C                                             | 0.018468  | 2.694879  | -3.074173 | H                       | -0.132124 | 3.439789  | 2.515392  |
| H                                             | 0.121872  | 3.574366  | -3.713620 | H                       | -0.686433 | 2.041265  | 3.480112  |
| H                                             | 0.461196  | 1.833858  | -3.582823 | H                       | 0.102912  | 1.783743  | 1.901637  |
| H                                             | -2.104936 | 3.268125  | -2.873174 | H                       | -4.461117 | 2.096964  | -1.426558 |
| H                                             | -1.854334 | 1.520761  | -3.086430 | H                       | -3.625387 | 0.560513  | -1.075695 |
| C                                             | 1.546529  | -0.684980 | 0.554538  | H                       | -5.149615 | 0.960315  | -0.236030 |
| H                                             | 1.589422  | -0.526004 | 1.650296  | H                       | -3.878876 | -4.094284 | -0.150159 |
| C                                             | 2.971340  | -0.434428 | 0.045668  | H                       | -4.521731 | -2.529181 | 0.387030  |
| C                                             | 4.061612  | -1.110312 | 0.611058  | H                       | -4.417086 | -1.875015 | -1.923533 |
| C                                             | 3.208416  | 0.468682  | -0.991459 | H                       | -3.354076 | -3.239081 | -2.327382 |
| C                                             | 5.355806  | -0.891148 | 0.147810  | O                       | 0.721783  | -0.491841 | -0.153109 |
| H                                             | 3.890552  | -1.813885 | 1.420060  | B                       | 0.111249  | -1.854337 | -0.052860 |
| C                                             | 4.505383  | 0.689262  | -1.453567 | B                       | 1.814738  | 1.126014  | -1.614657 |
| H                                             | 2.371532  | 1.015670  | -1.402432 | C                       | 1.970258  | -0.208046 | -0.784959 |
| C                                             | 5.583862  | 0.010358  | -0.891720 | O                       | 0.906837  | 2.107084  | -1.304525 |
| H                                             | 6.187581  | -1.421365 | 0.600696  | O                       | 2.588007  | 1.429310  | -2.705376 |
| H                                             | 4.672829  | 1.405285  | -2.251810 | C                       | 1.035696  | 3.163318  | -2.271478 |
| H                                             | 6.591872  | 0.186141  | -1.252217 | C                       | 2.230554  | 2.742692  | -3.165600 |
| <b>Int1-B<sub>2</sub>eg<sub>2</sub>-coord</b> |           |           |           | C                       | 1.124447  | -3.913841 | -0.485967 |
| Cu                                            | 0.985015  | 0.163183  | -0.095632 | O                       | 0.520072  | -2.779397 | -1.102867 |
| B                                             | -1.184485 | 2.036465  | 0.196526  | C                       | 0.651836  | -3.855107 | 0.976206  |
| O                                             | -0.638749 | 2.795764  | 1.209066  | O                       | 0.448752  | -2.475862 | 1.217379  |
| O                                             | -1.116614 | 2.645028  | -1.027441 | H                       | 1.213805  | 4.107087  | -1.747932 |
| C                                             | 2.710518  | 0.861877  | -0.027211 | H                       | 0.098505  | 3.245553  | -2.831460 |
| N                                             | 3.316604  | 1.449890  | 1.041727  | H                       | 3.095291  | 3.404934  | -3.051567 |
| N                                             | 3.672069  | 0.847382  | -0.991629 | H                       | 1.969436  | 2.688401  | -4.226986 |
| C                                             | 4.627776  | 1.790185  | 0.751577  | H                       | 2.221457  | -3.834524 | -0.550376 |
| C                                             | 4.850980  | 1.414807  | -0.535197 | H                       | 0.814199  | -4.828829 | -1.001748 |
| C                                             | -0.114412 | 4.003122  | 0.630535  | H                       | -0.288950 | -4.409101 | 1.107115  |
| C                                             | -0.536696 | 3.945780  | -0.859985 | H                       | 1.392769  | -4.255158 | 1.676252  |
| C                                             | 3.459421  | 0.338245  | -2.343677 | H                       | 2.190241  | -1.032240 | -1.475584 |
| C                                             | 2.677016  | 1.616641  | 2.345723  | C                       | 3.128203  | -0.096279 | 0.210497  |
| O                                             | -0.837484 | -0.335388 | -0.121237 | C                       | 4.386764  | 0.343883  | -0.222087 |
| H                                             | 5.278363  | 2.257247  | 1.474860  | C                       | 2.960091  | -0.432047 | 1.556651  |
| H                                             | 5.729299  | 1.503786  | -1.155866 | C                       | 5.450265  | 0.448848  | 0.670494  |
| H                                             | 0.974690  | 4.009402  | 0.755219  | H                       | 4.533427  | 0.602428  | -1.265403 |
| H                                             | -0.531646 | 4.863872  | 1.161979  | C                       | 4.027265  | -0.322821 | 2.448104  |
| H                                             | 0.309971  | 4.053409  | -1.545651 | H                       | 2.004101  | -0.821197 | 1.882413  |
| H                                             | -1.287971 | 4.701550  | -1.113568 | C                       | 5.273836  | 0.120660  | 2.013646  |
| H                                             | 4.338000  | -0.228959 | -2.663061 | H                       | 6.418119  | 0.787305  | 0.315423  |
| H                                             | 2.588093  | -0.318823 | -2.331141 | H                       | 3.882874  | -0.598210 | 3.487862  |
| H                                             | 3.288347  | 1.161987  | -3.044184 | H                       | 6.101365  | 0.201914  | 2.710130  |
| H                                             | 1.596667  | 1.665280  | 2.200635  | <b>1+egB-O-CHPh-Beg</b> |           |           |           |
| H                                             | 2.913816  | 0.773231  | 3.001008  | Cu                      | -2.059696 | 0.336219  | 0.328648  |
| H                                             | 3.025687  | 2.545423  | 2.804618  | B                       | -1.410341 | 2.189451  | 0.074543  |
| B                                             | -0.647697 | -1.751805 | 0.537972  | C                       | -2.850871 | -1.403667 | 0.599818  |
| O                                             | -0.623617 | -1.564565 | 1.988747  | N                       | -4.186912 | -1.687606 | 0.588451  |
| O                                             | -1.751268 | -2.655415 | 0.252835  | N                       | -2.264354 | -2.616815 | 0.789467  |
| C                                             | -1.446674 | -2.563590 | 2.565410  | C                       | -4.423961 | -3.042145 | 0.759707  |
| C                                             | -2.457661 | -2.904899 | 1.459514  | C                       | -3.204855 | -3.628971 | 0.883115  |
| H                                             | -3.347889 | -2.261316 | 1.523984  | C                       | -0.818669 | -2.831271 | 0.808936  |
| H                                             | -2.787842 | -3.949020 | 1.491150  | C                       | -5.222348 | -0.676027 | 0.425541  |
| H                                             | -1.921934 | -2.182224 | 3.476506  | C                       | -1.111512 | 4.321470  | -0.818593 |
| H                                             | -0.845678 | -3.446441 | 2.831127  | O                       | -1.781656 | 3.055029  | -0.958975 |
| B                                             | 0.810456  | -2.417022 | -0.166310 | C                       | -0.186885 | 4.147826  | 0.401094  |
| O                                             | 1.629626  | -3.279661 | 0.540824  | O                       | -0.499939 | 2.839714  | 0.915741  |
| O                                             | 1.233195  | -2.330205 | -1.499761 | H                       | -5.418386 | -3.460892 | 0.786791  |
| C                                             | 2.664747  | -3.775120 | -0.317806 | H                       | -2.929483 | -4.662179 | 1.030140  |
| C                                             | 2.234027  | -3.338583 | -1.729084 | H                       | -0.583863 | -3.626444 | 1.522049  |
| H                                             | 1.782610  | -4.157681 | -2.297581 | H                       | -0.463689 | -3.105141 | -0.187609 |
| H                                             | 3.053159  | -2.917866 | -2.318673 | H                       | -0.324522 | -1.909163 | 1.113769  |
| H                                             | 2.740176  | -4.859541 | -0.211707 | H                       | -5.864518 | -0.634443 | 1.311291  |
| H                                             | 3.619801  | -3.327788 | -0.018960 | H                       | -4.722181 | 0.285070  | 0.293961  |

|   |           |           |           |
|---|-----------|-----------|-----------|
| H | -5.834674 | -0.891761 | -0.455871 |
| H | -0.558442 | 4.538424  | -1.736536 |
| H | -1.860500 | 5.105512  | -0.670415 |
| H | -0.372601 | 4.893661  | 1.179347  |
| H | 0.873231  | 4.175936  | 0.134411  |
| O | 1.226000  | -0.794339 | -0.927958 |
| B | 0.319830  | -0.300181 | -1.804466 |
| B | 1.910120  | 0.607550  | 1.004698  |
| C | 2.284527  | 0.046789  | -0.431681 |
| O | 1.057676  | -0.019054 | 1.866863  |
| O | 2.478860  | 1.746063  | 1.501970  |
| C | 0.907278  | 0.832346  | 3.022586  |
| C | 1.970016  | 1.942023  | 2.836199  |
| C | -0.715024 | 1.051666  | -3.305210 |
| O | 0.394911  | 0.936604  | -2.397530 |
| C | -1.575115 | -0.206404 | -3.032741 |
| O | -0.748739 | -1.060577 | -2.226079 |
| H | 1.068537  | 0.234518  | 3.924057  |
| H | -0.107479 | 1.235619  | 3.017372  |
| H | 2.803738  | 1.856824  | 3.541811  |
| H | 1.538276  | 2.942889  | 2.902965  |
| H | -0.324927 | 1.079753  | -4.329958 |
| H | -1.253692 | 1.971451  | -3.080116 |
| H | -2.475548 | 0.043360  | -2.464924 |
| H | -1.857558 | -0.735877 | -3.945588 |
| H | 2.416892  | 0.895030  | -1.111968 |
| C | 3.593756  | -0.727011 | -0.384585 |
| C | 4.778197  | -0.055615 | -0.054523 |
| C | 3.648283  | -2.095251 | -0.654752 |
| C | 5.988945  | -0.738451 | -0.002527 |
| H | 4.744924  | 1.005610  | 0.167971  |
| C | 4.863488  | -2.777855 | -0.602472 |
| H | 2.736172  | -2.615631 | -0.915098 |
| C | 6.037524  | -2.105024 | -0.276935 |
| H | 6.897214  | -0.202087 | 0.250357  |
| H | 4.889975  | -3.840426 | -0.819987 |
| H | 6.981529  | -2.637182 | -0.238445 |
